# Supplementary material for: USP21 promotes self-renewal and tumorigenicity of mesenchymal glioblastoma stem cells by deubiquitinating and stabilizing FOXD1
Source: PubMed Central journal article supplement (PMC9381540; doi:10.1038/s41419-022-05163-3), 2022-08-16

Figure 1a

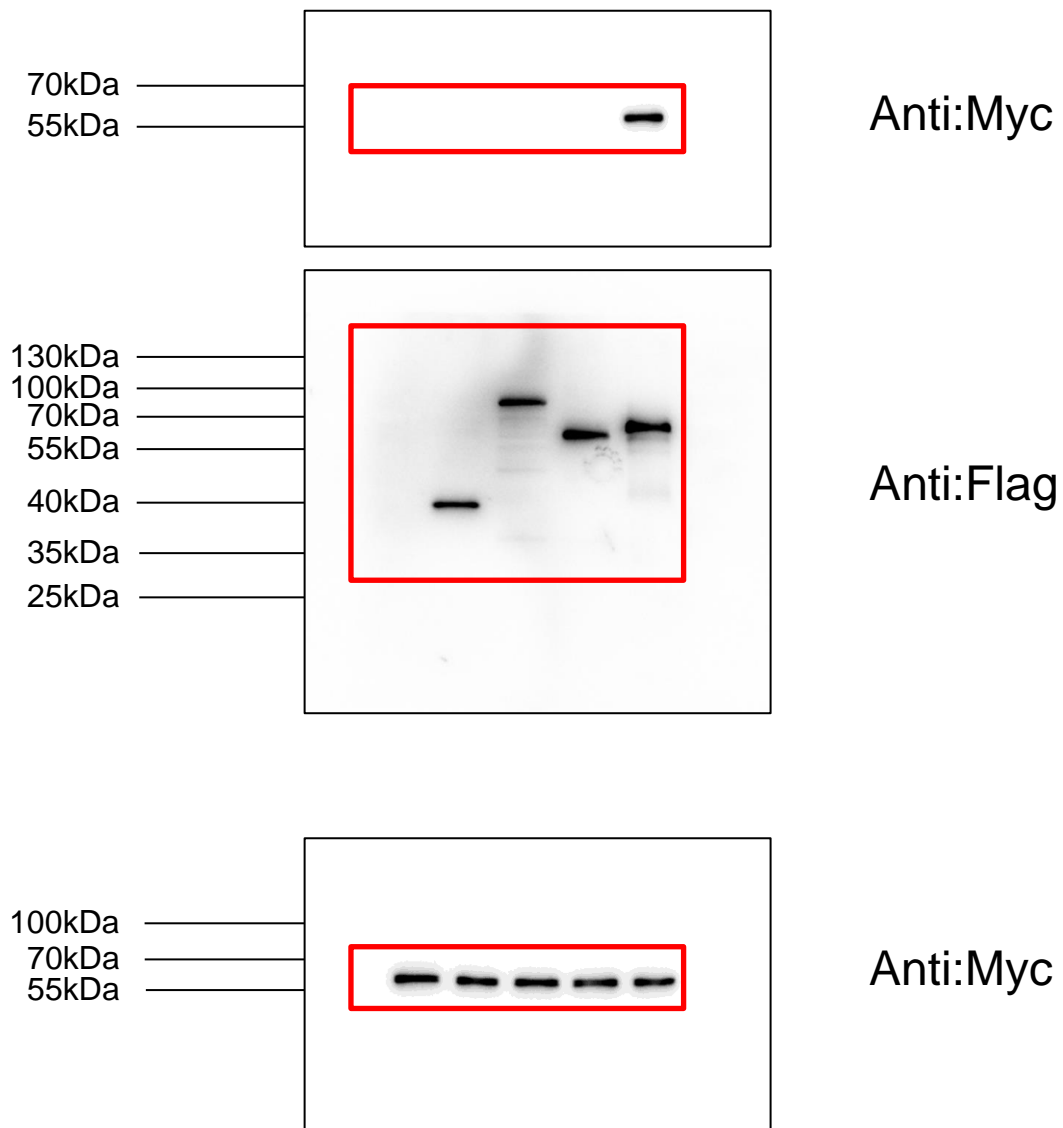

Figure 1b

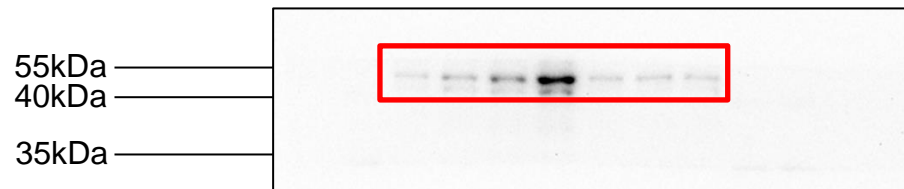

FOXD1

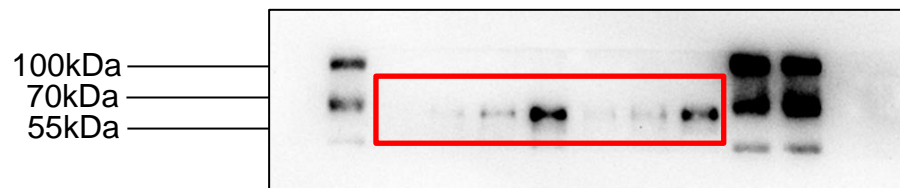

Anti:Flag

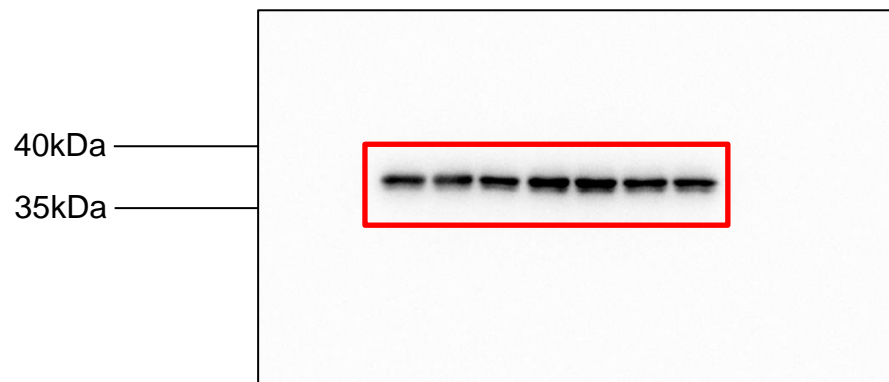

GAPDH

Figure 1c

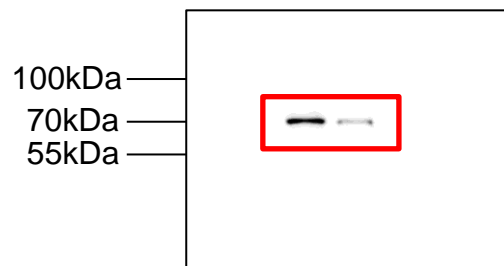

USP21

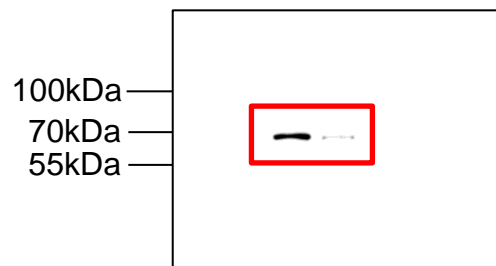

USP21

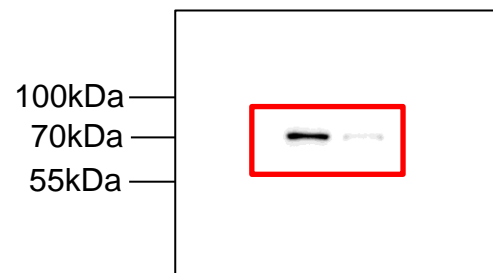

USP21

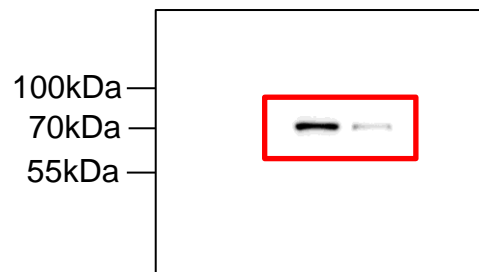

USP21

Figure 1c

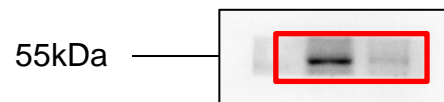

FOXD1

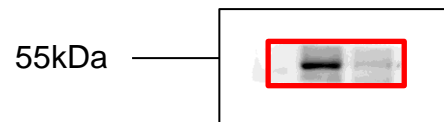

FOXD1

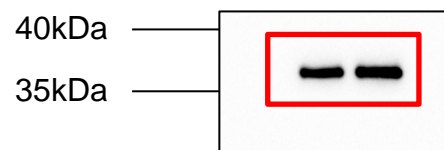

GAPDH

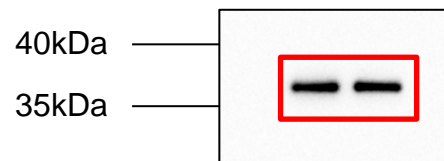

GAPDH

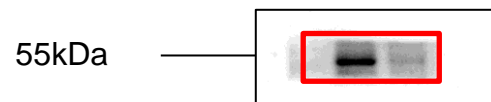

FOXD1

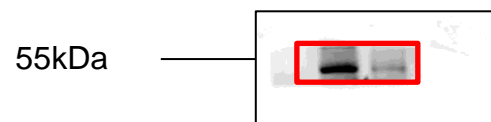

FOXD1

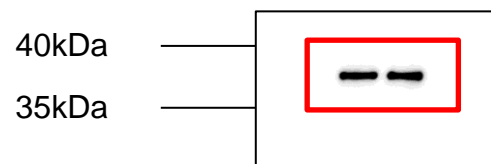

GAPDH

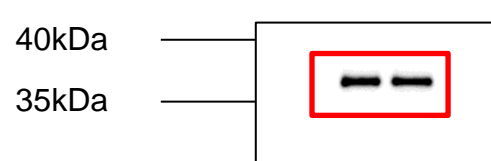

GAPDH

Figure 1d

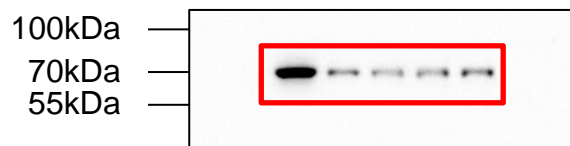

USP21

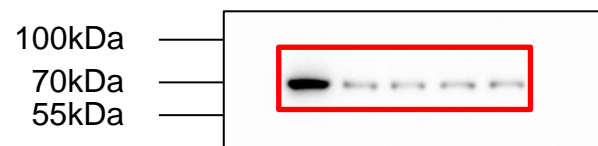

USP21

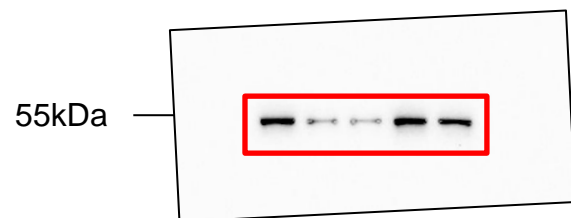

FOXD1

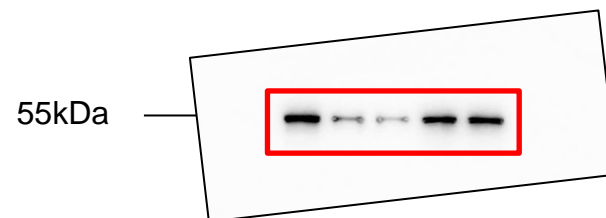

FOXD1

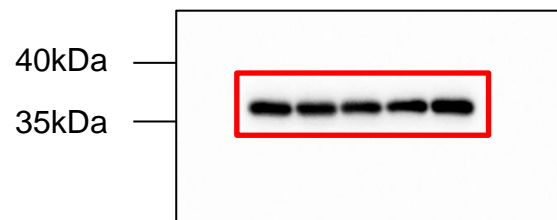

GAPDH

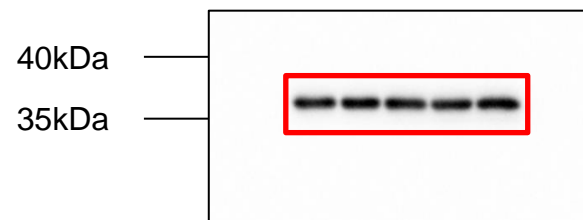

GAPDH

Figure 1e

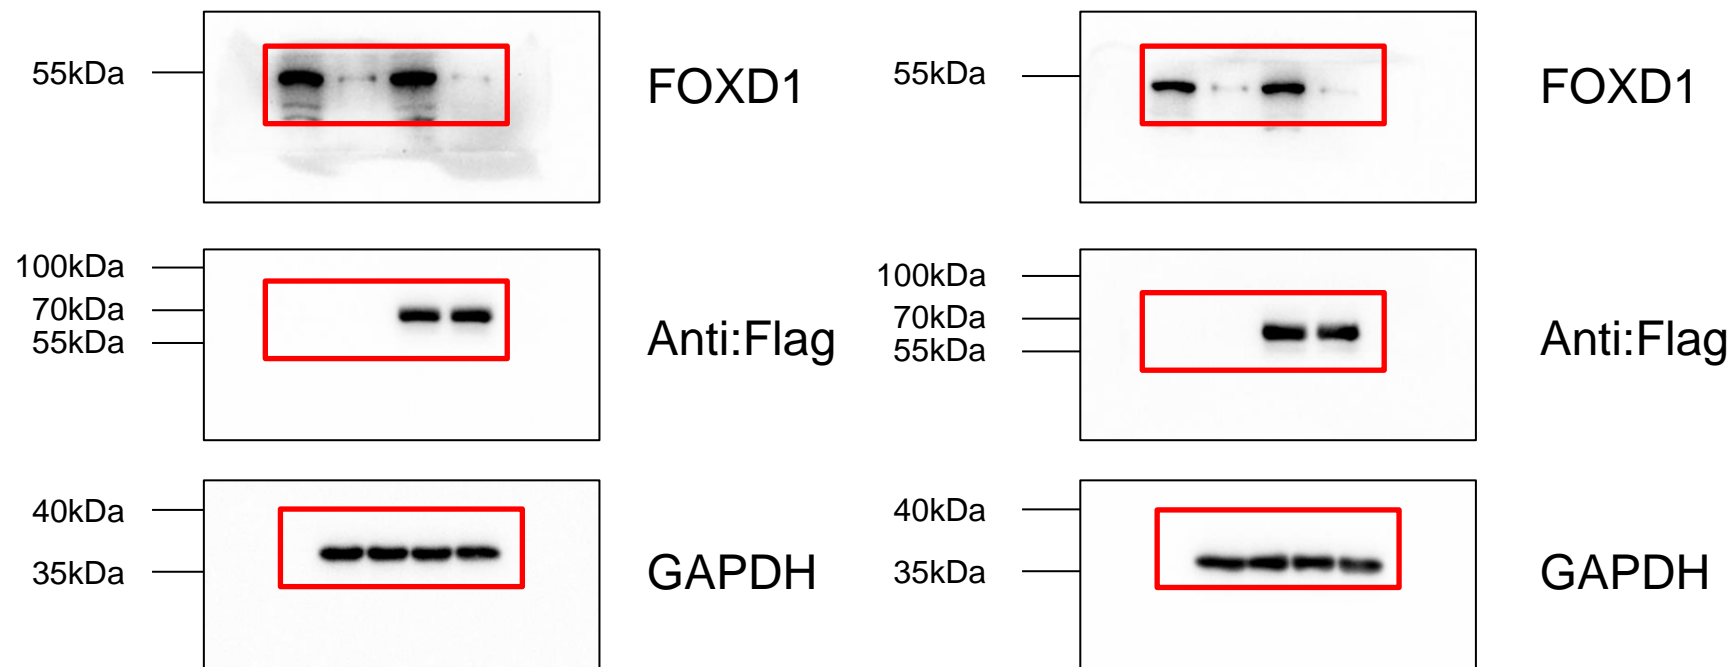

Figure 1f

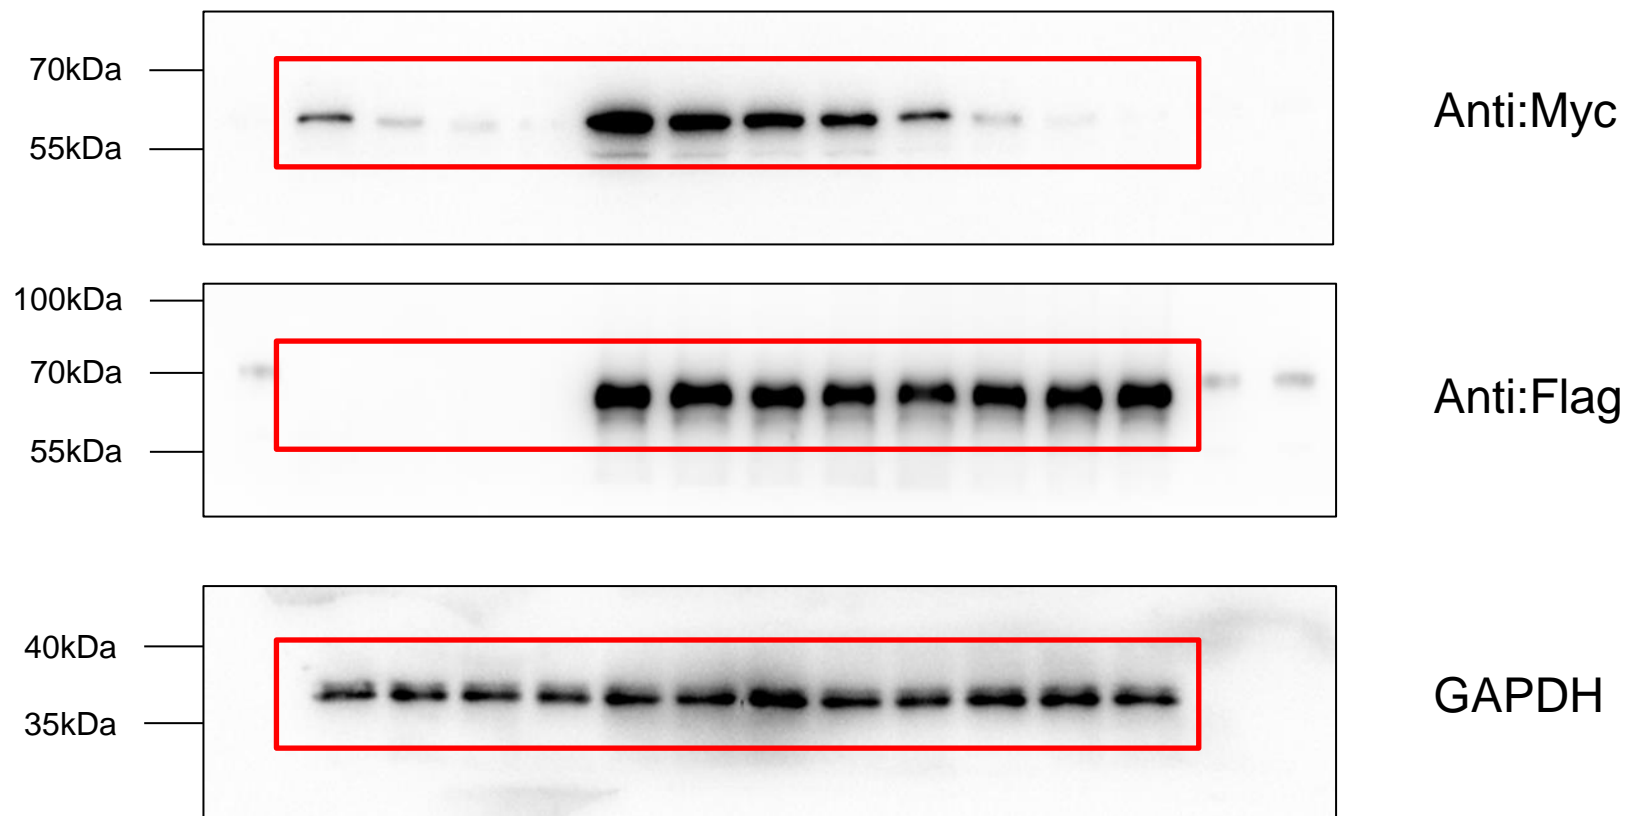

Figure 1g

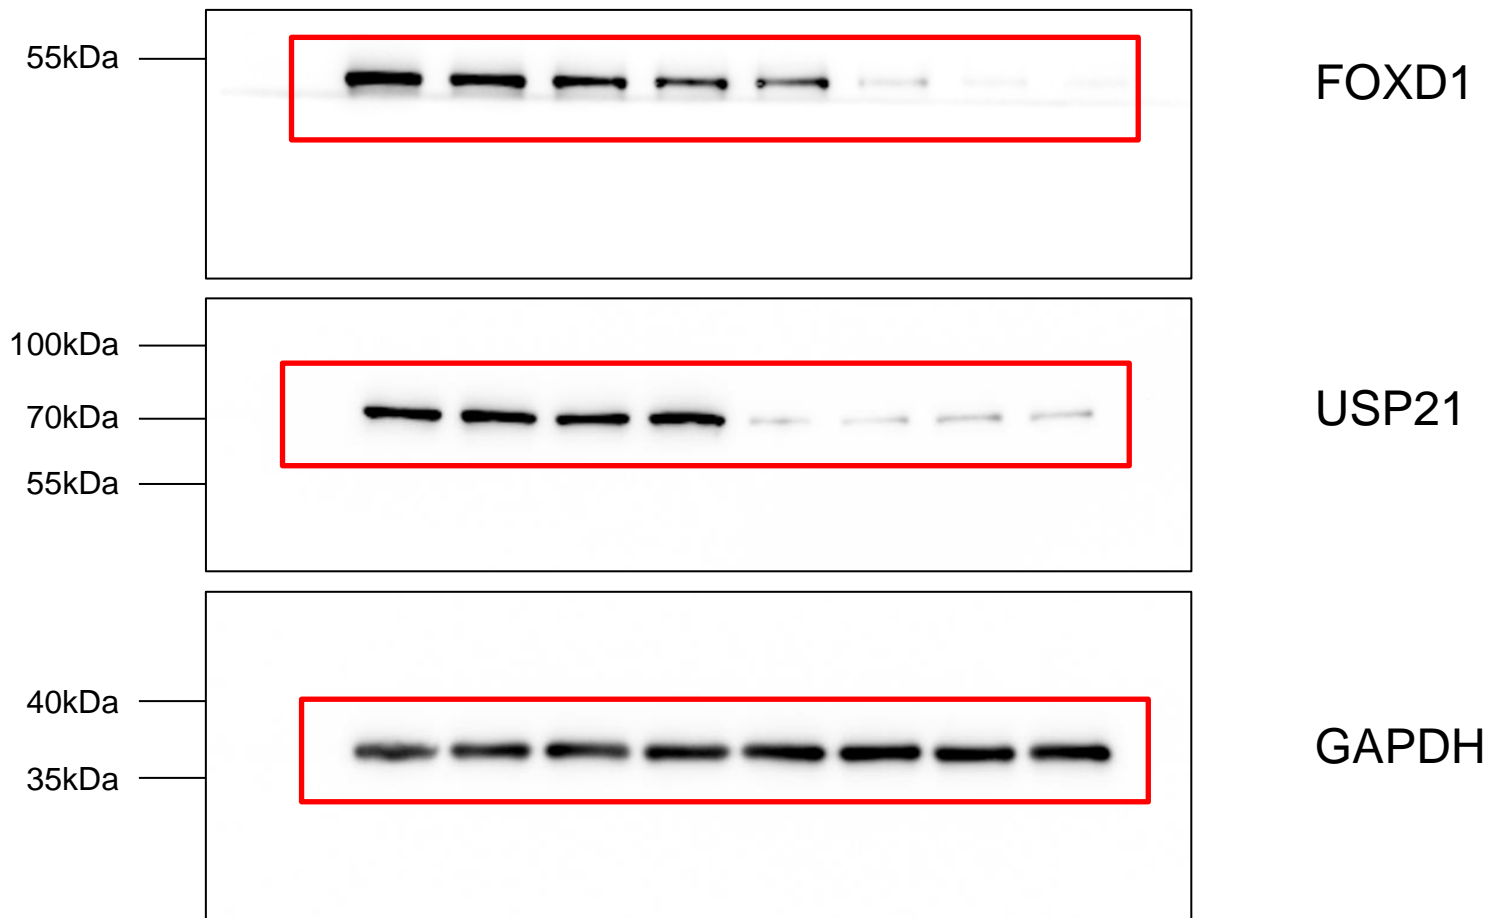



Figure 1h

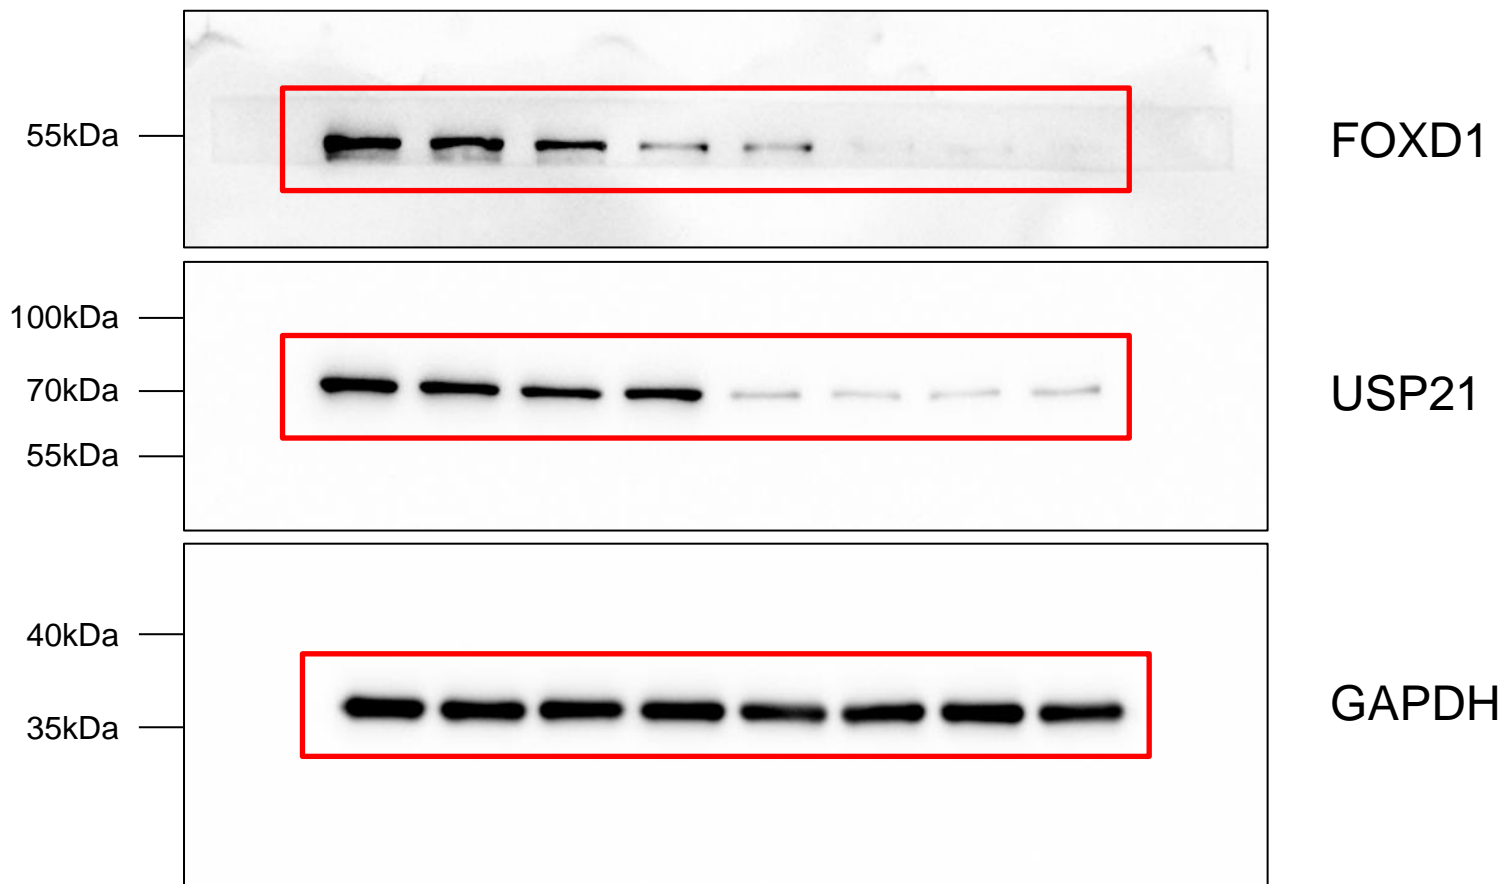

Figure 2a

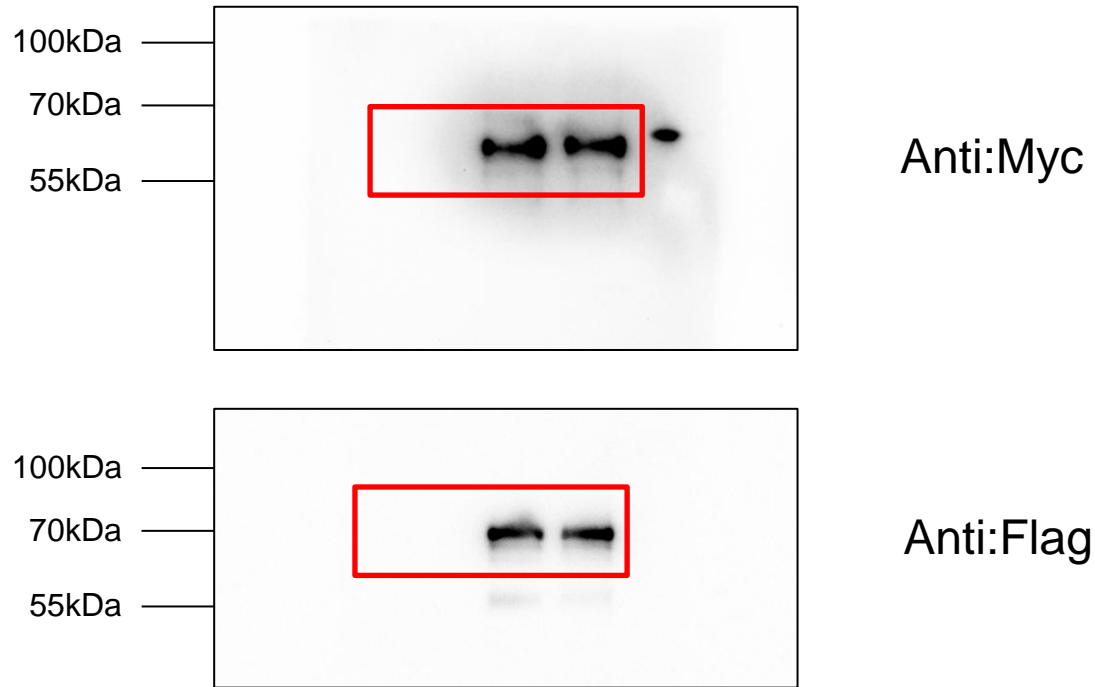

Figure 2a

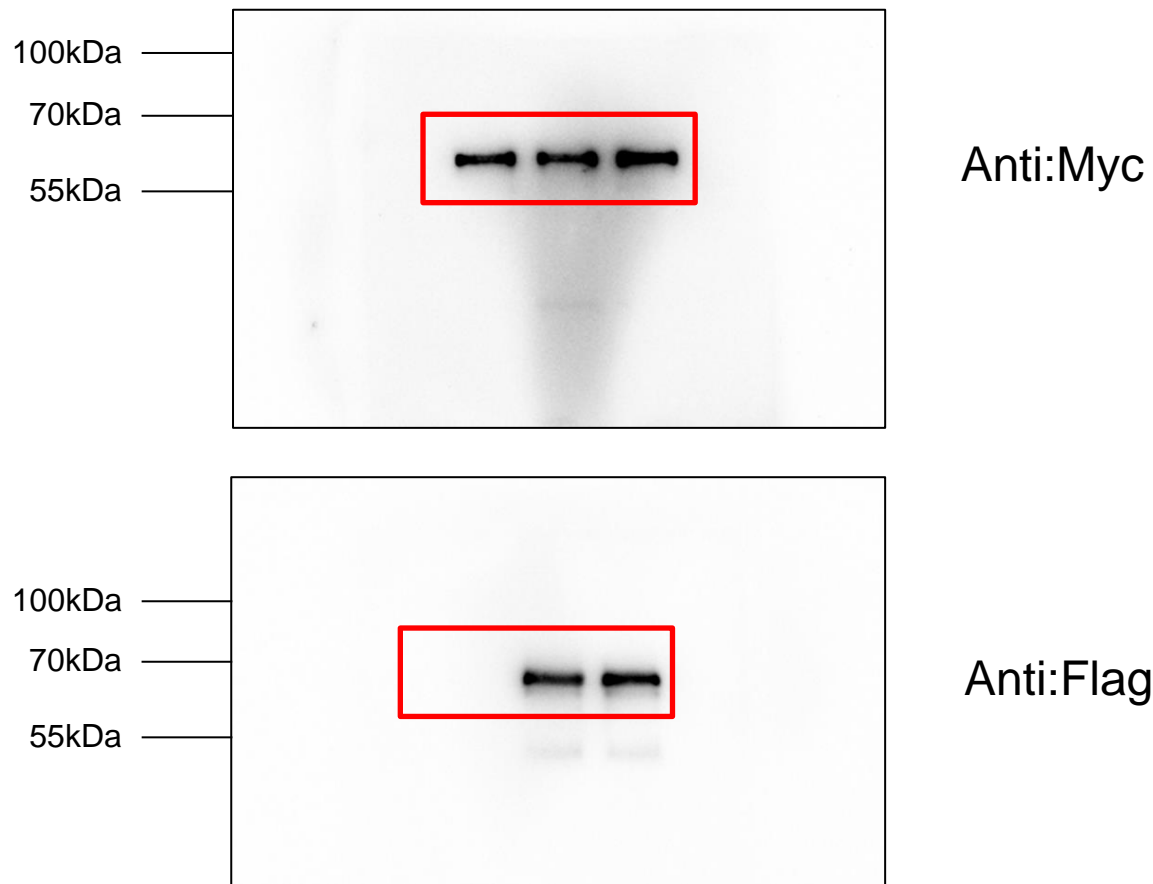

Figure 2b

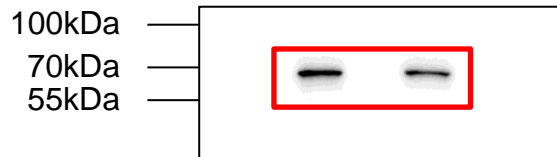

USP21

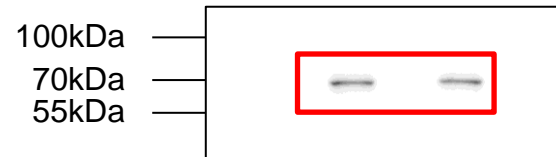

USP21

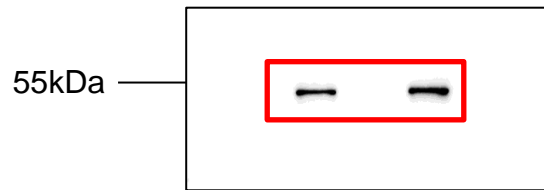

FOXD1

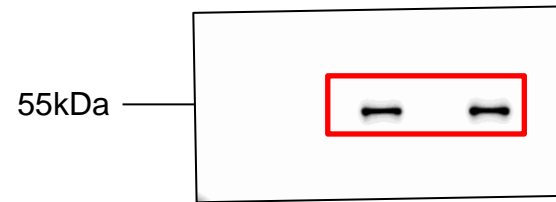

FOXD1

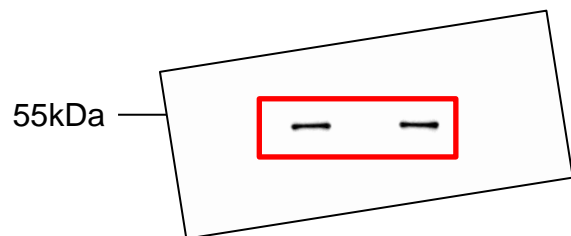

FOXD1

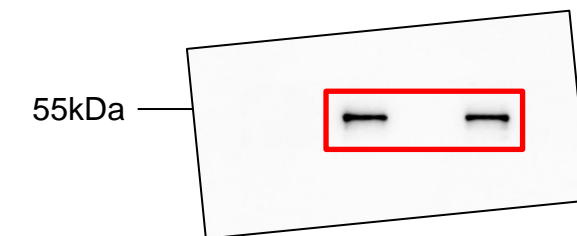

FOXD1

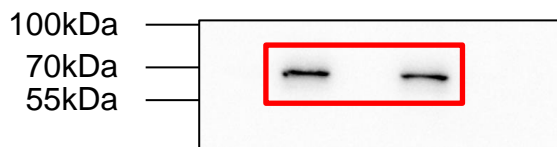

USP21

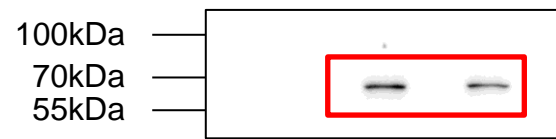

USP21

Figure 2c

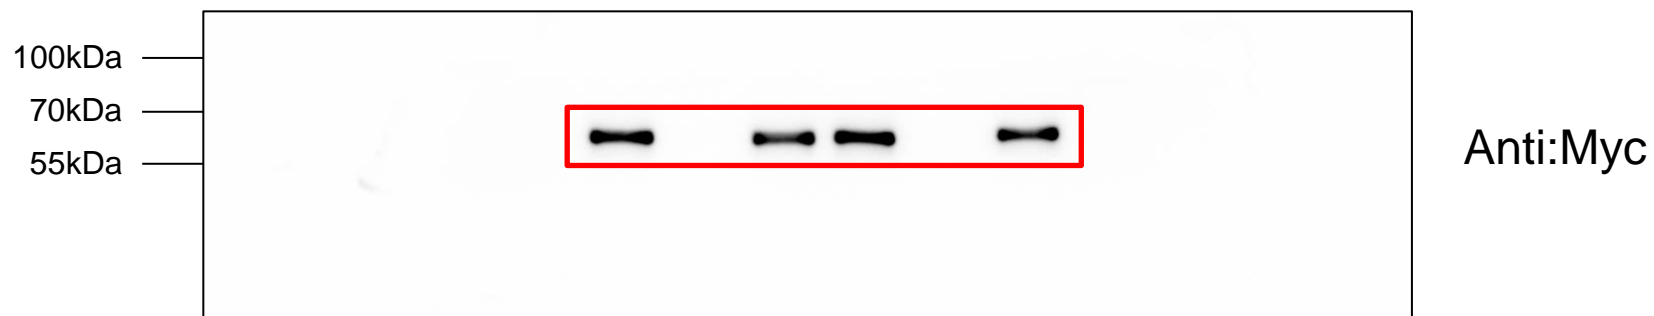

Figure 2e

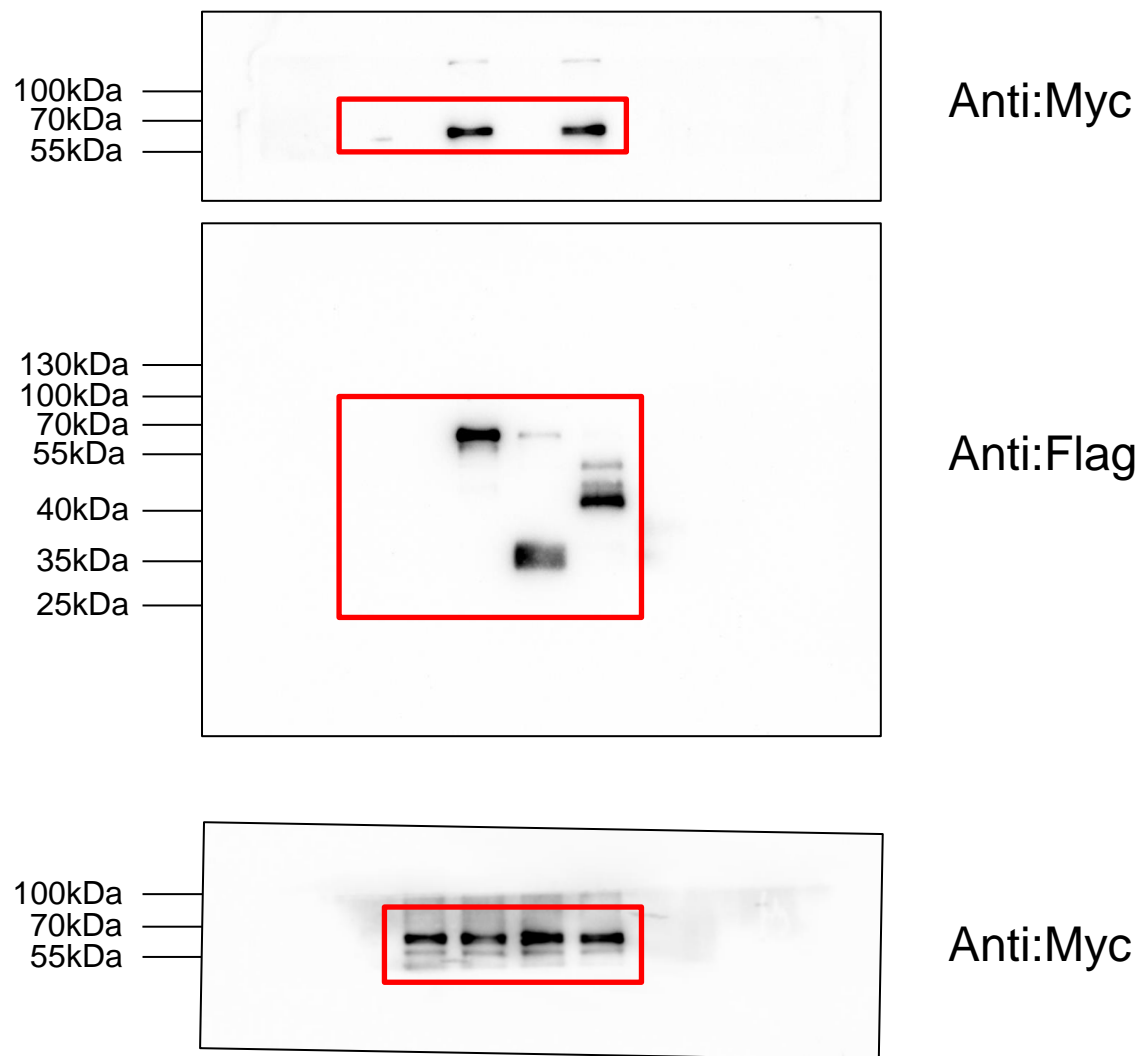

Figure 2e

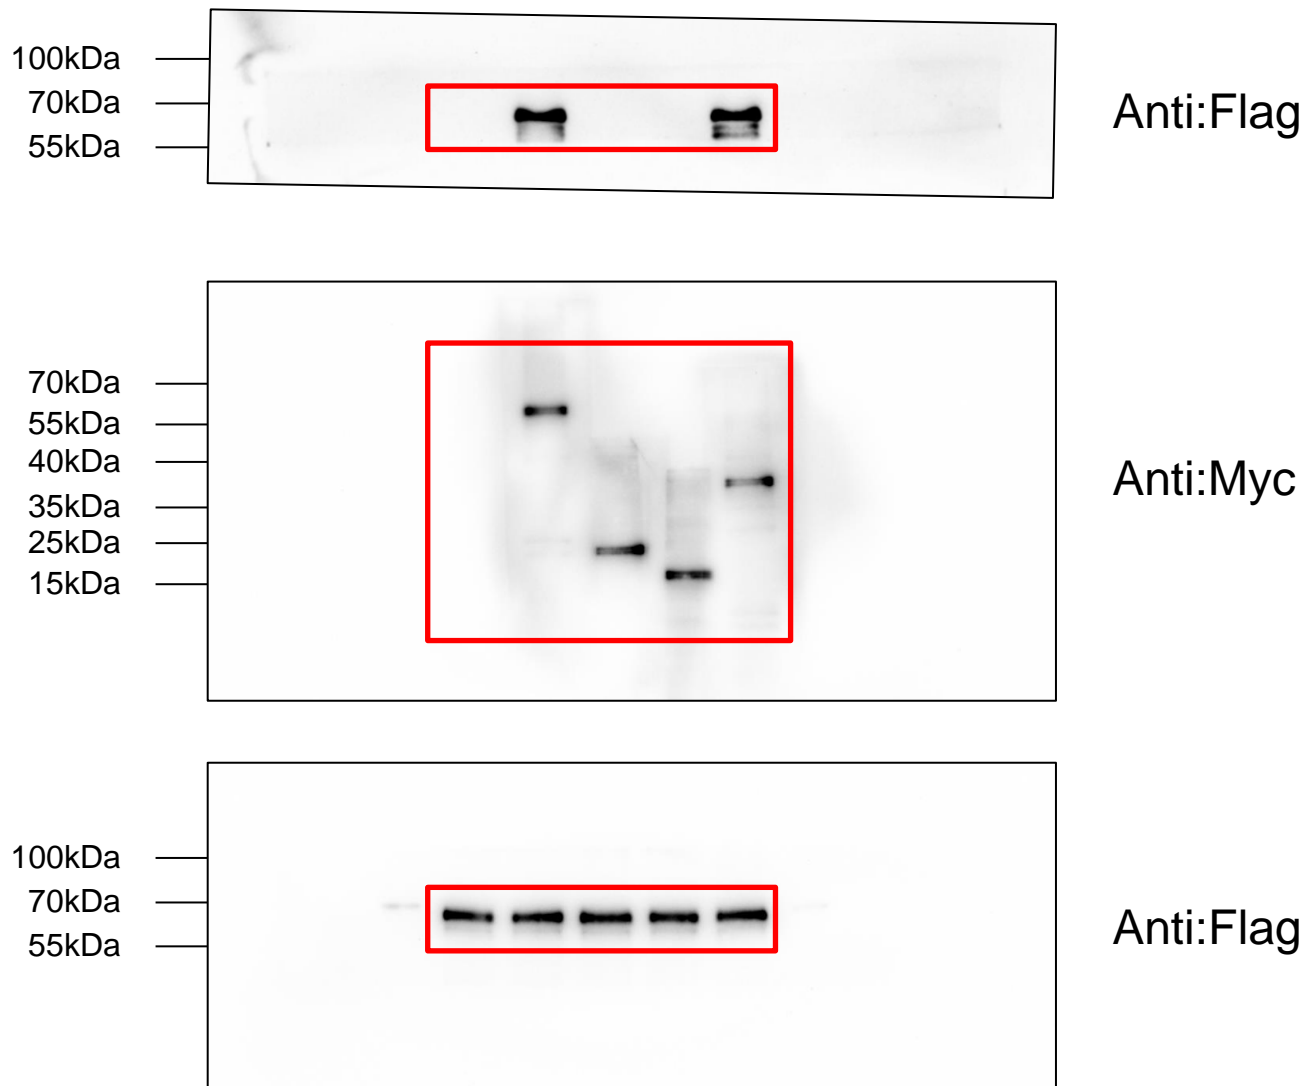

Figure 3a

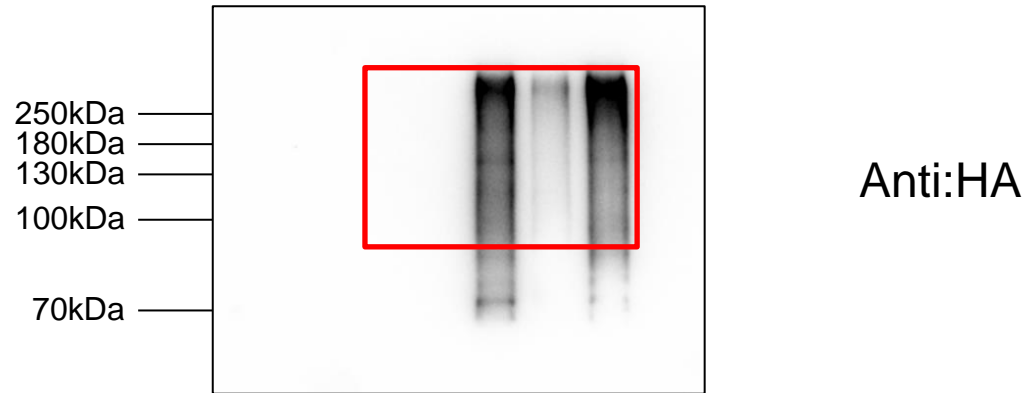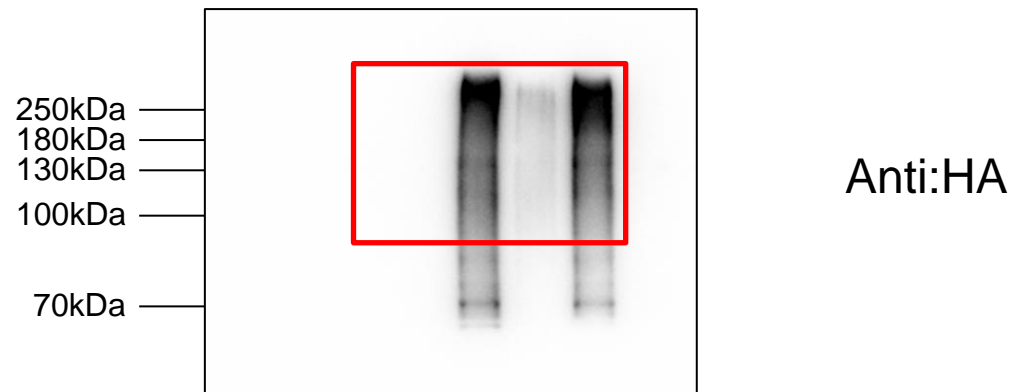



Figure 3a

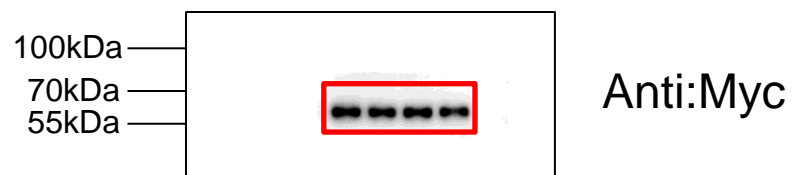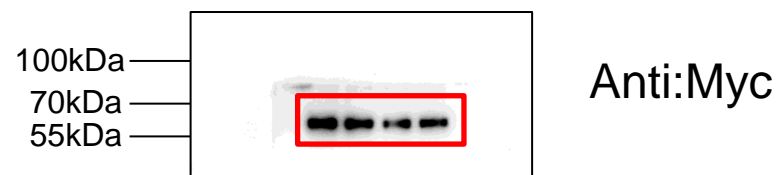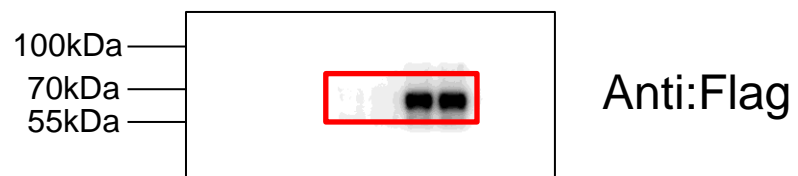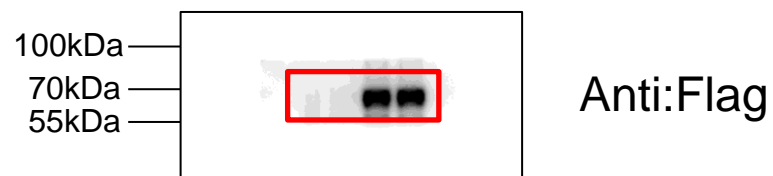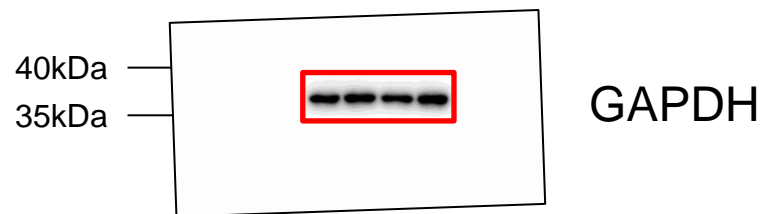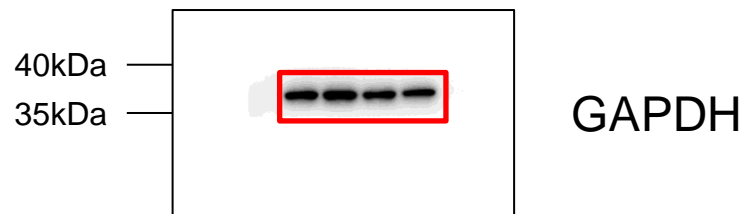

Figure 3b

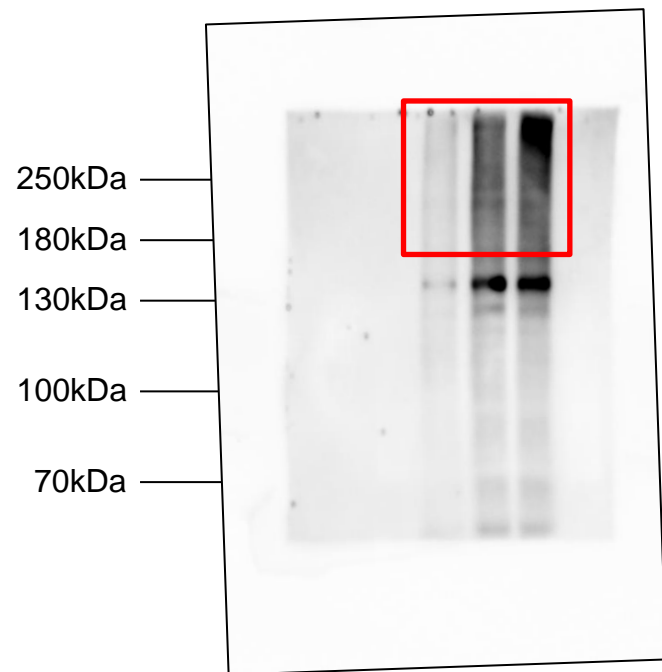

Anti:HA

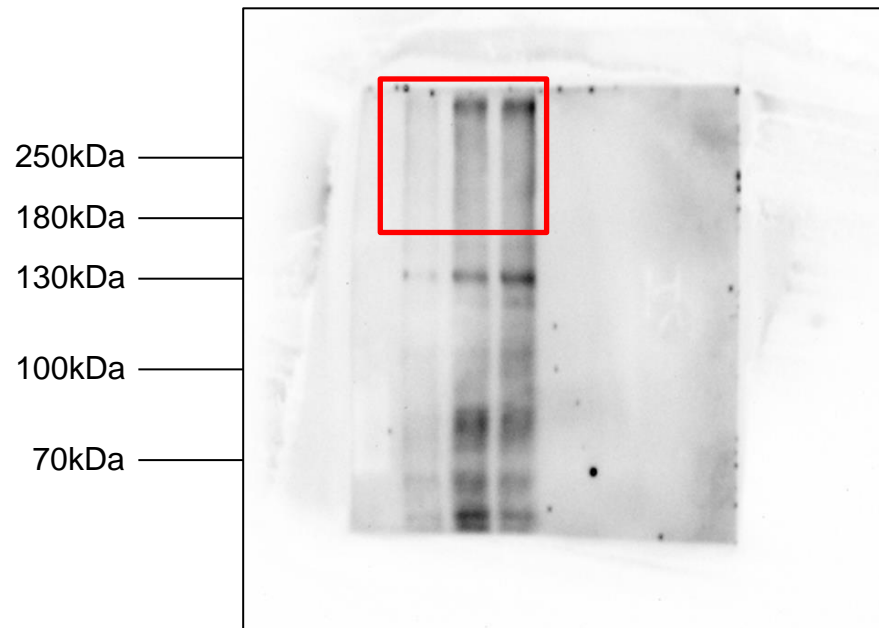

Anti:HA

Figure 3b

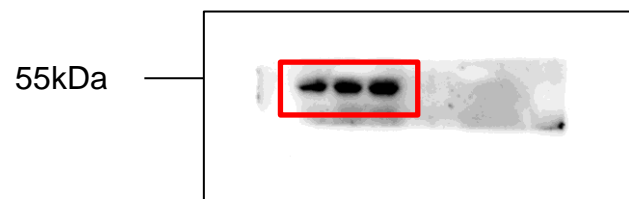

FOXD1

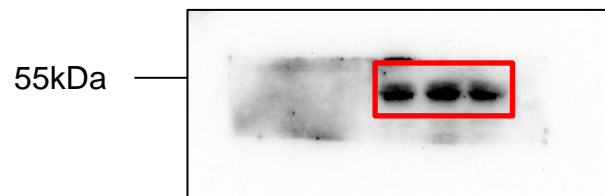

FOXD1

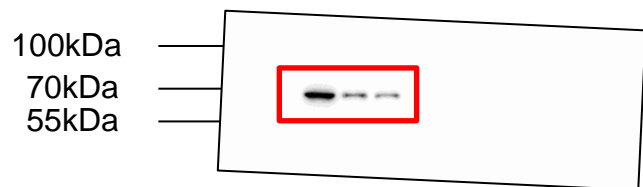

USP21

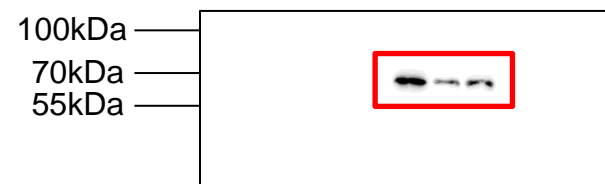

USP21

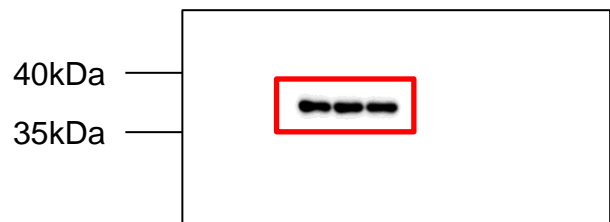

GAPDH

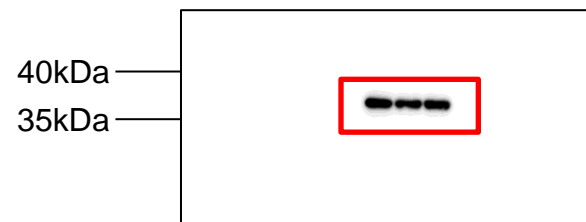

GAPDH

Figure 3c

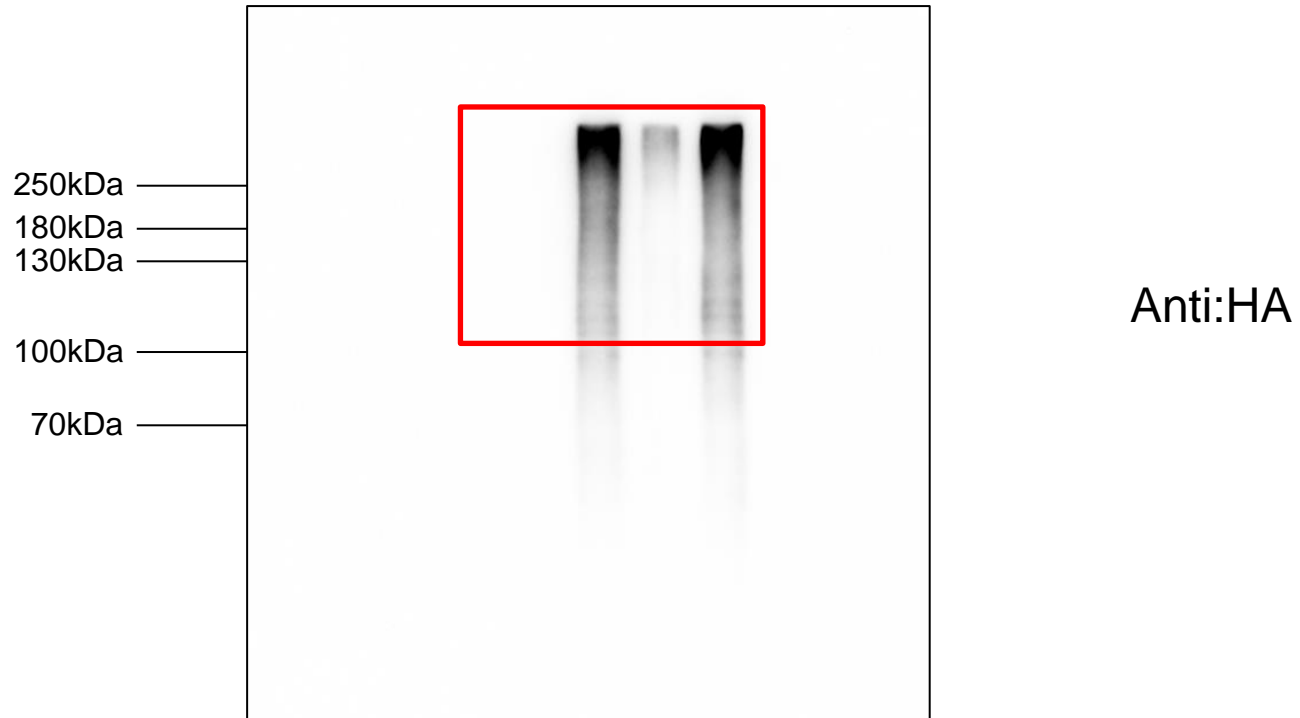

Figure 3c

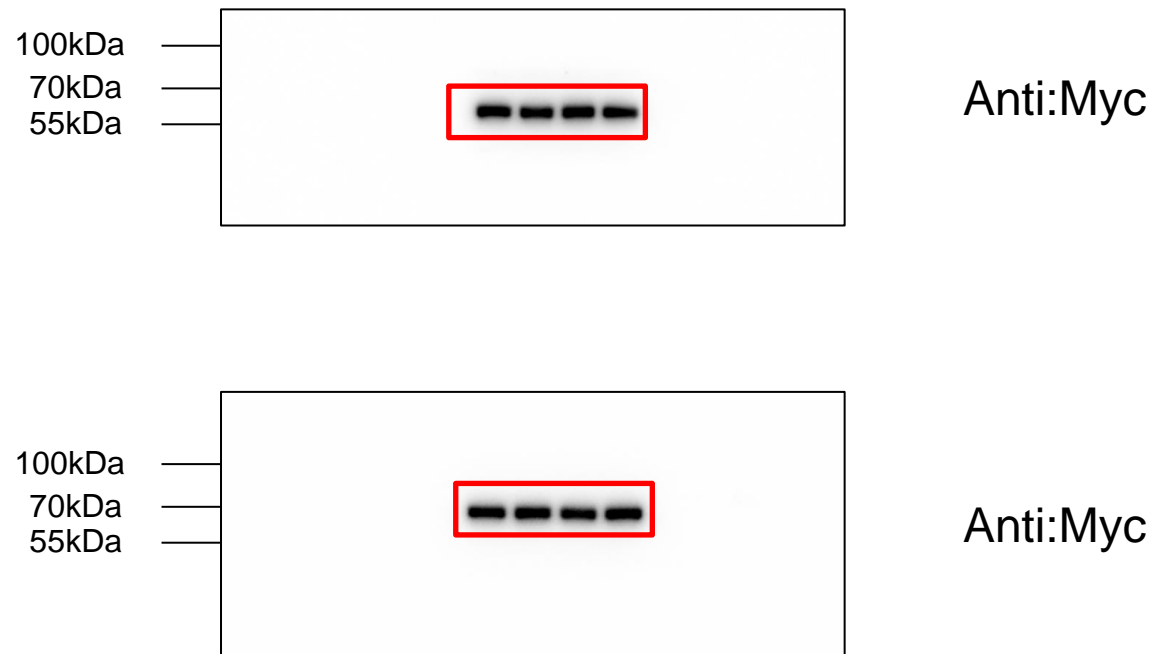

Figure 3d

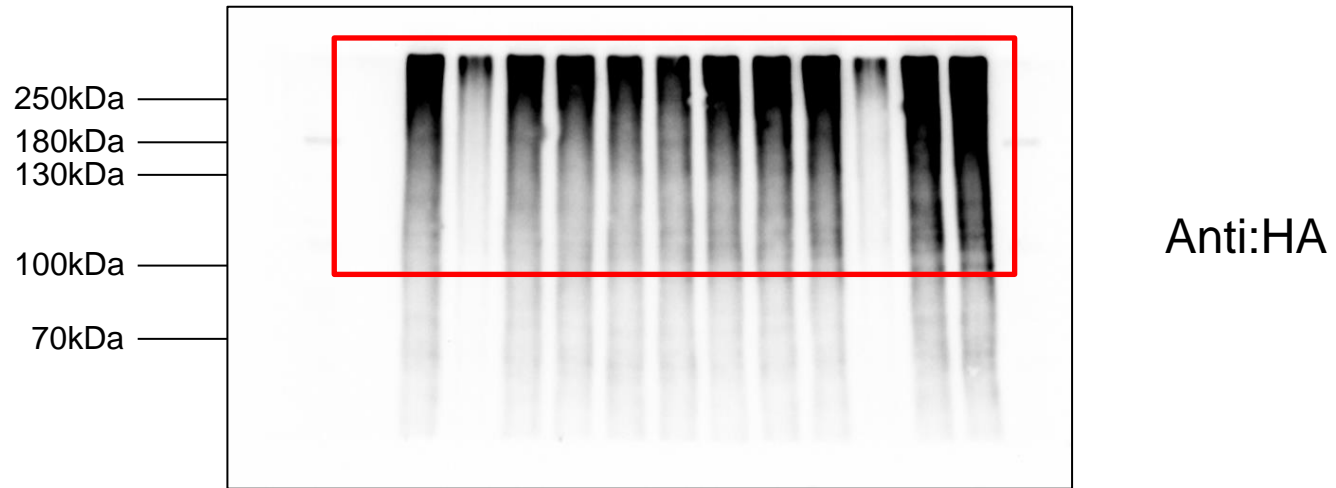

Figure 3d

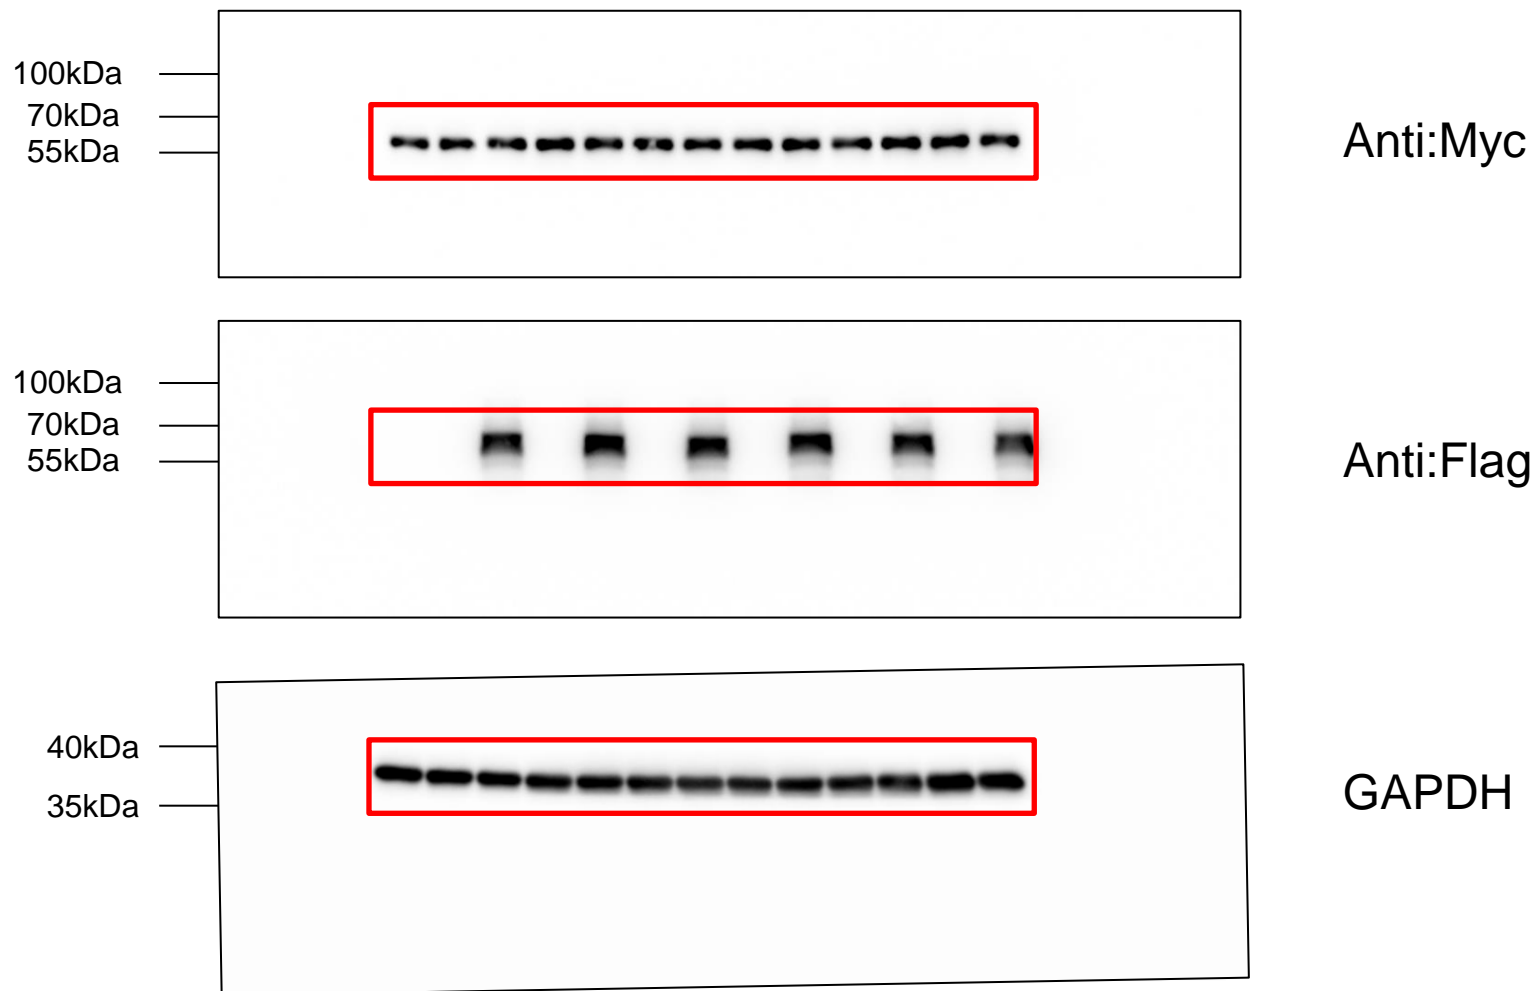

Figure 3d

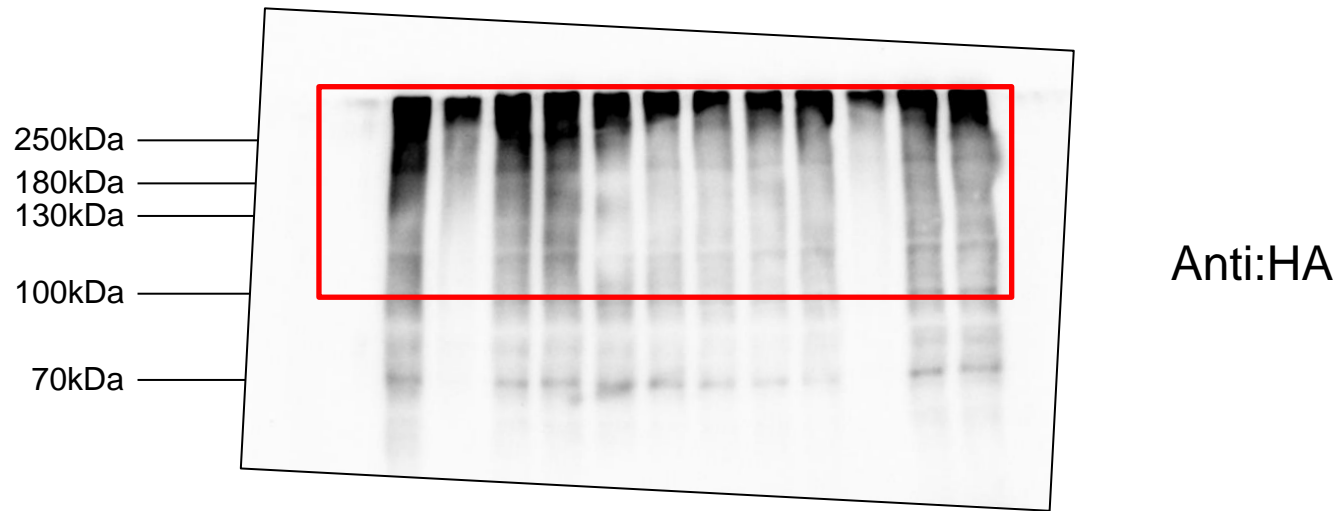



Figure 3d

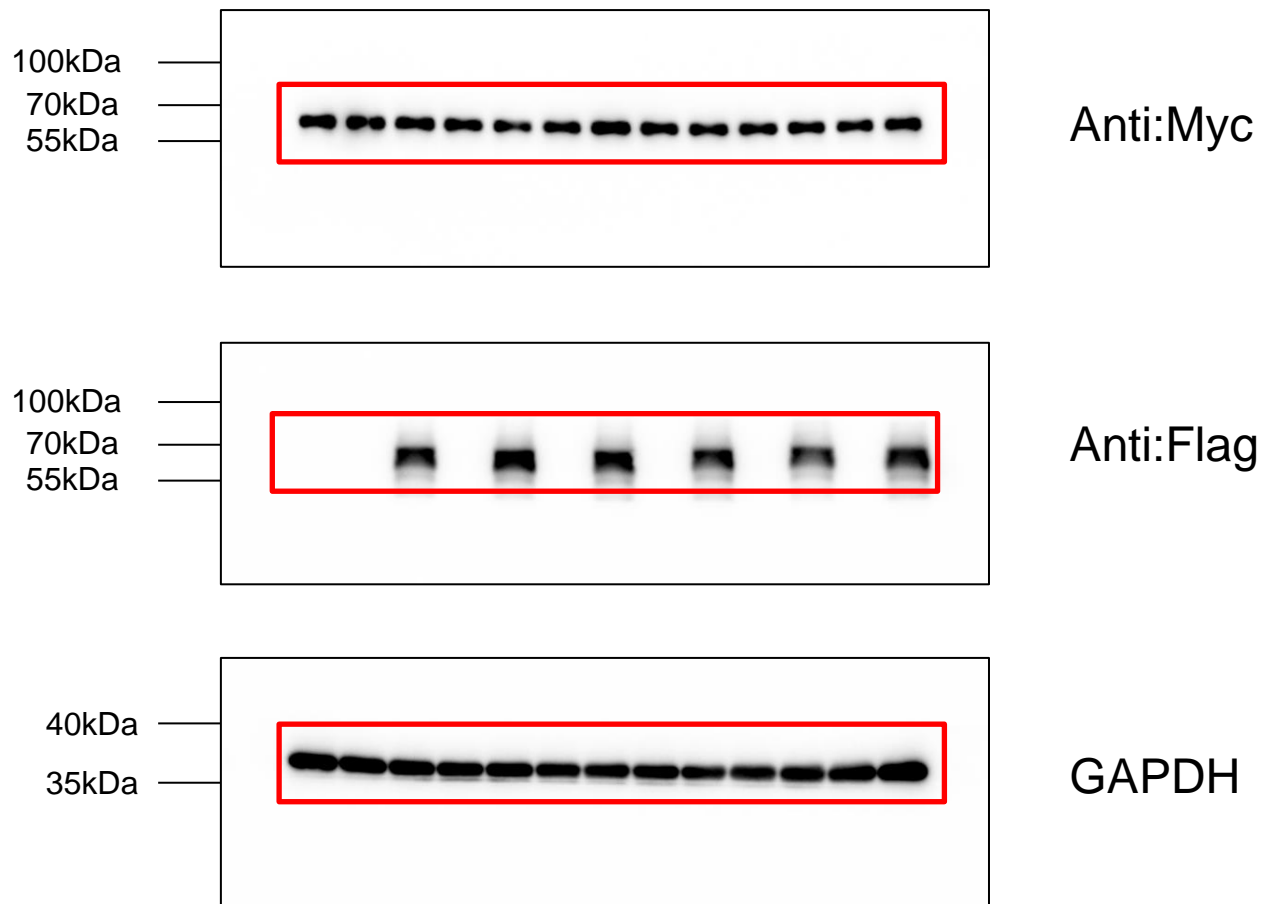

Figure 3e

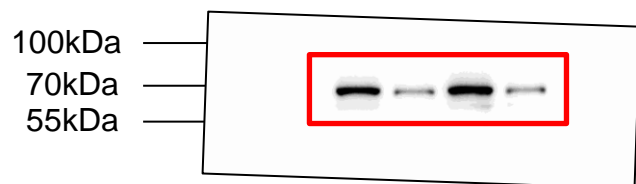

USP21

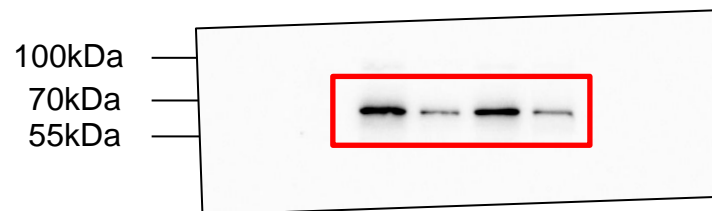

USP21

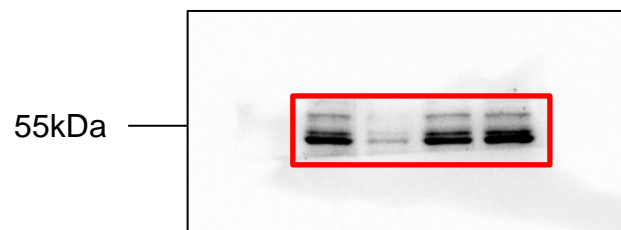

FOXD1

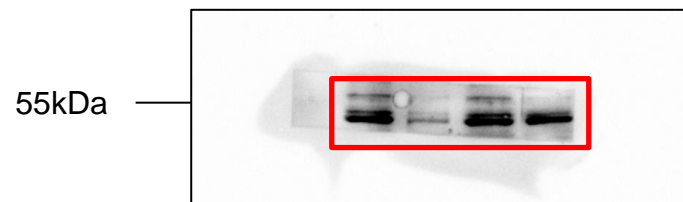

FOXD1

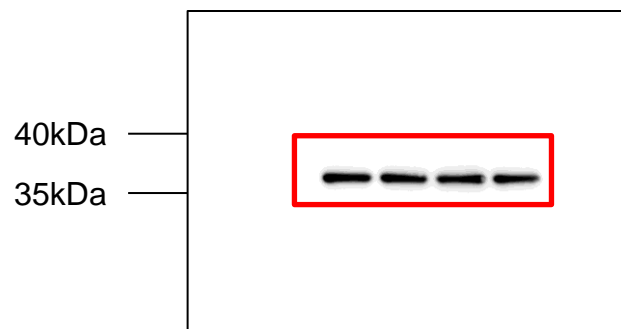

GAPDH

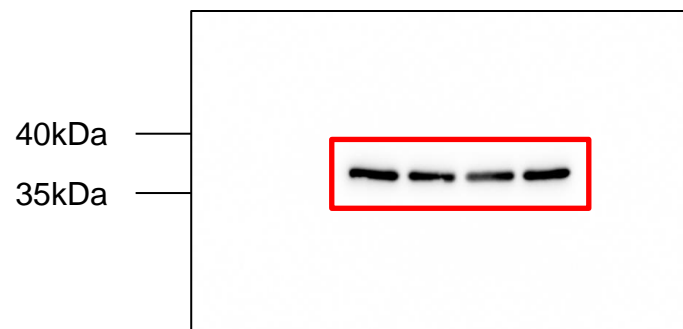

GAPDH

Figure 4e

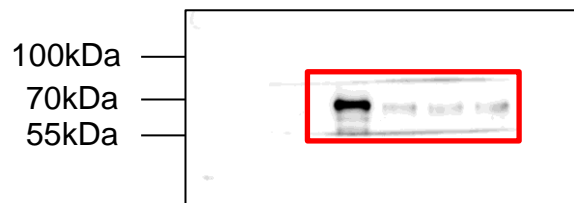

USP21

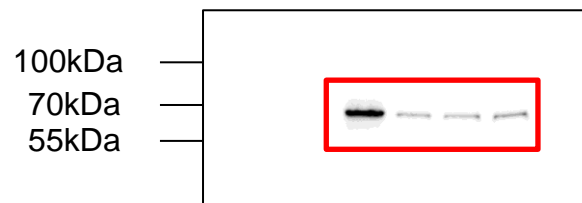

USP21

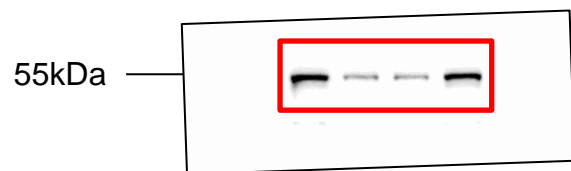

FOXD1

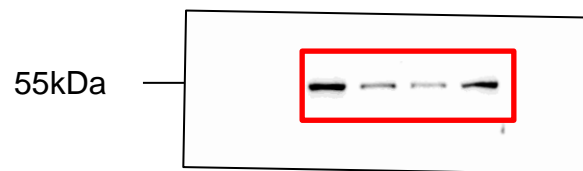

FOXD1

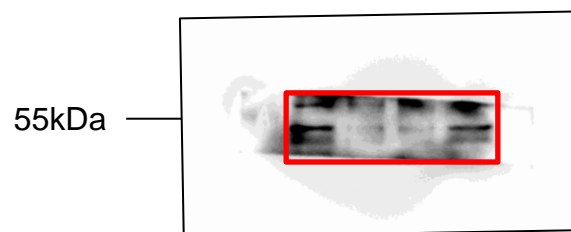

ALDH1A3

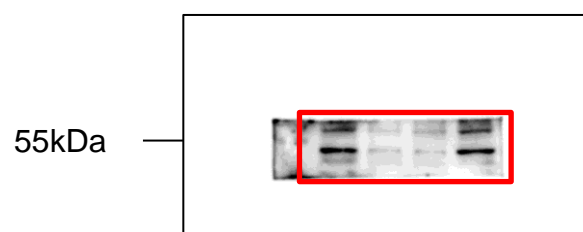

ALDH1A3

Figure 4e

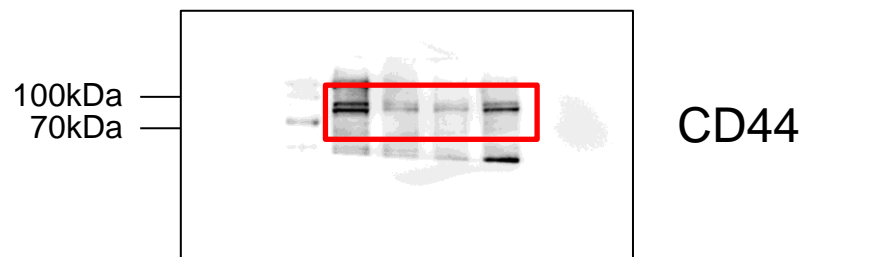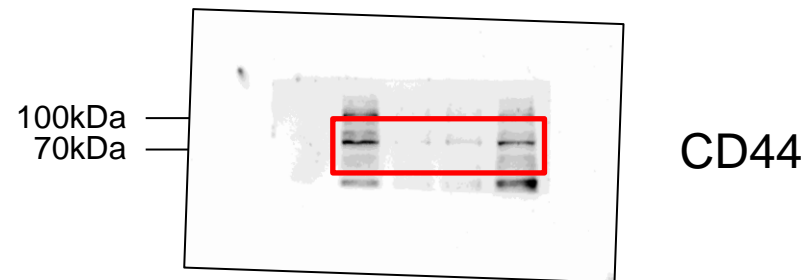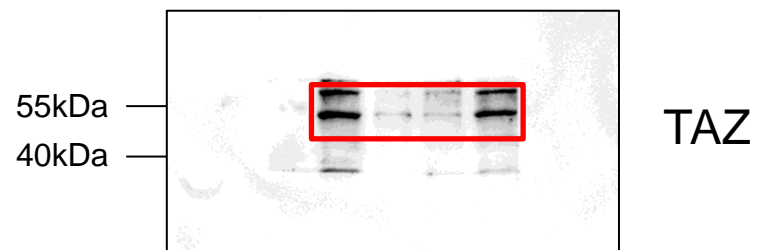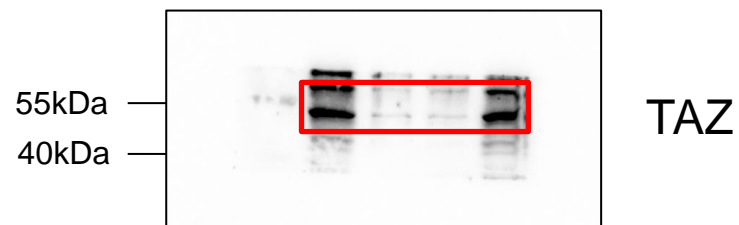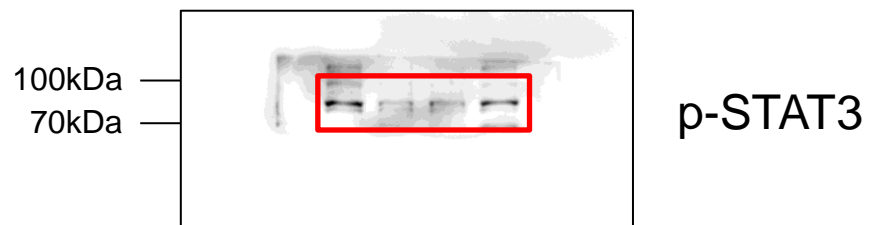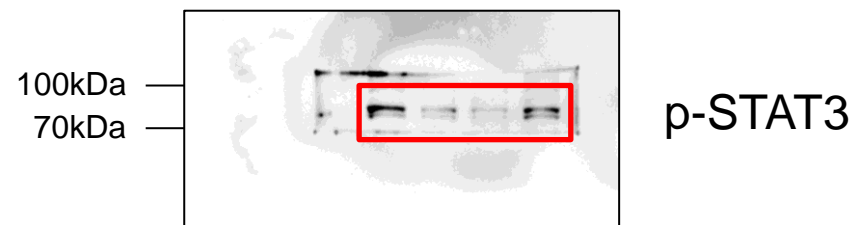

Figure 4e

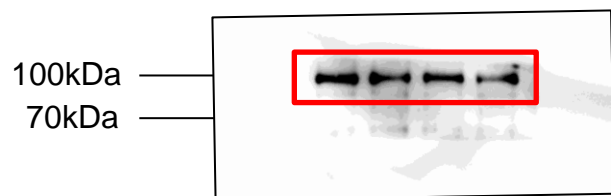

STAT3

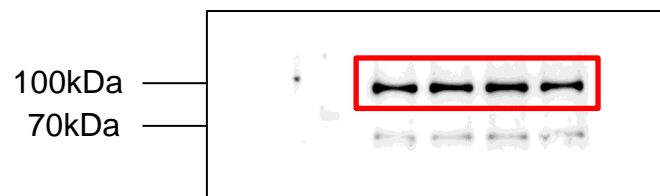

STAT3

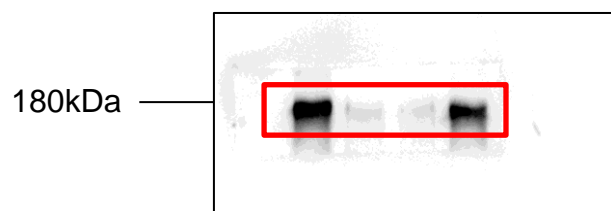

c-Met

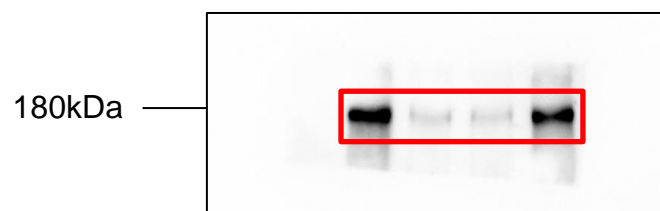

c-Met

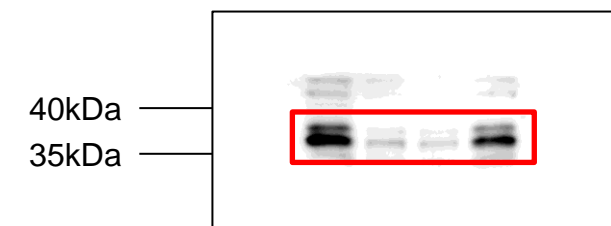

C/EBPβ

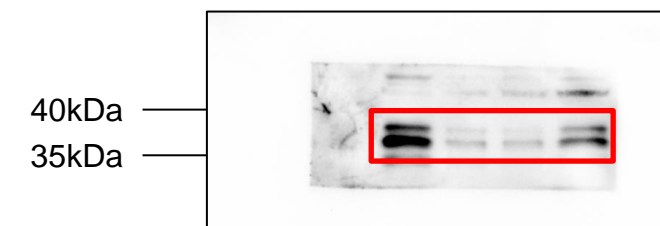

c/EBPβ

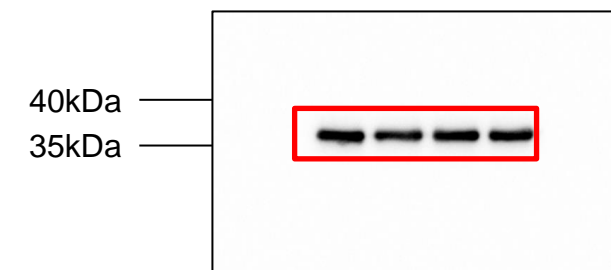

GAPDH

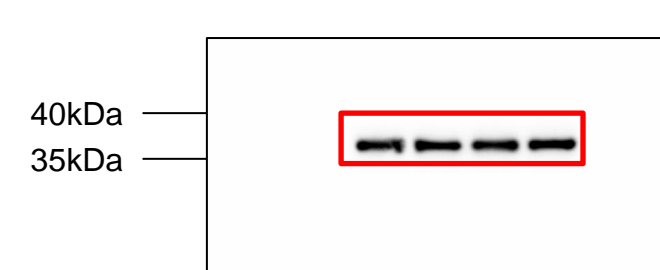

GAPDH

Figure 5a

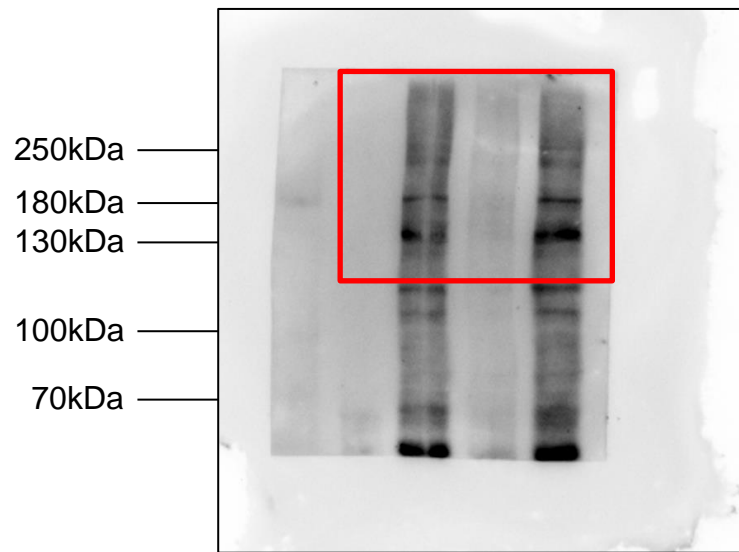

Anti:HA

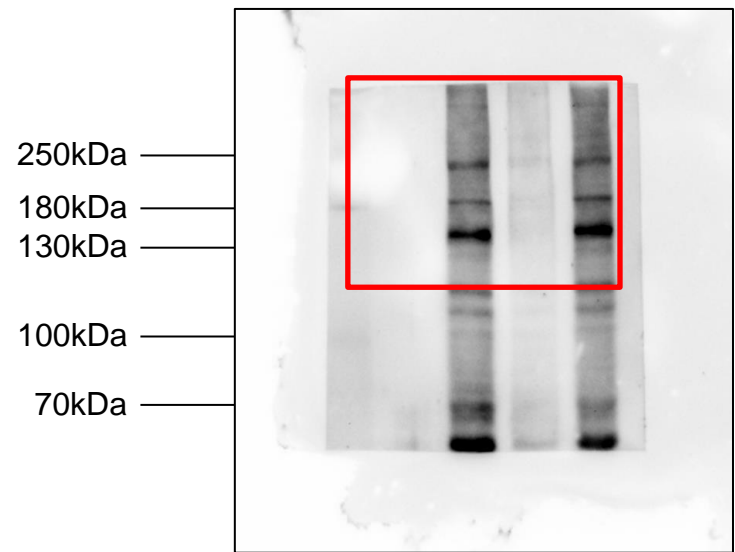

Anti:HA

Figure 5a

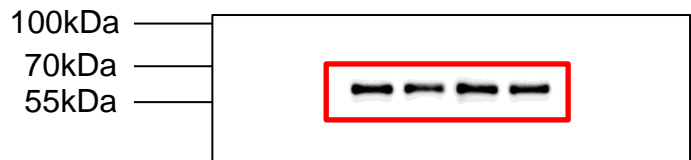

Anti:Myc

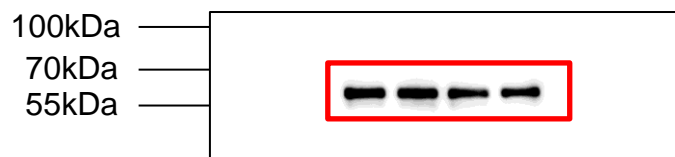

Anti:Myc

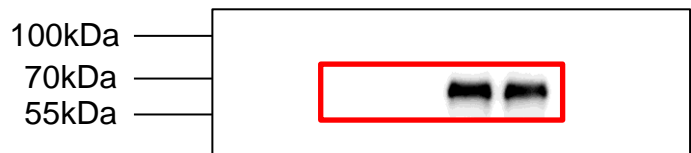

Anti:Flag

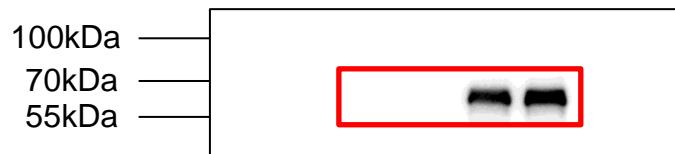

Anti:Flag

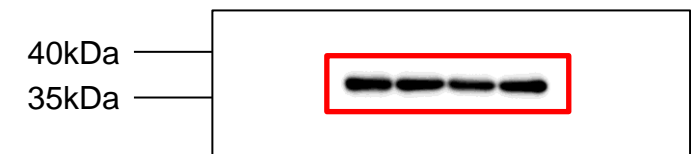

GAPDH

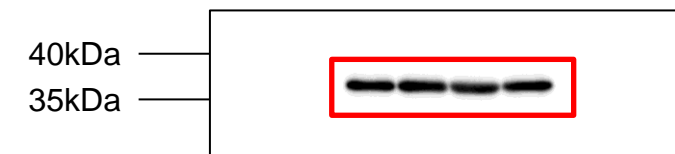

GAPDH

Figure 5b

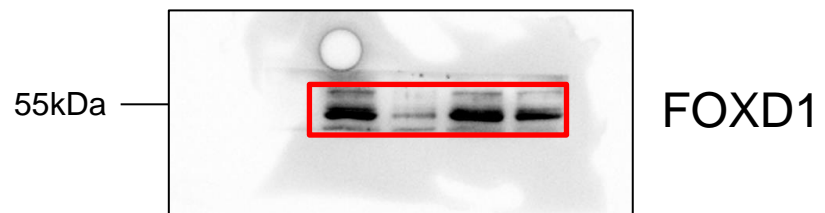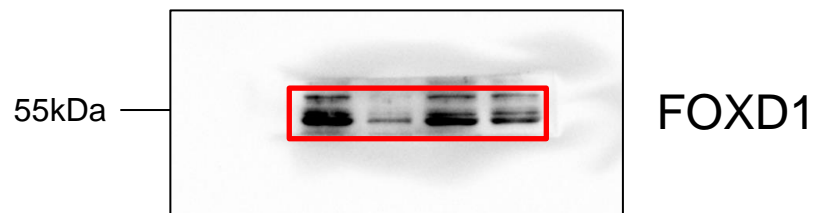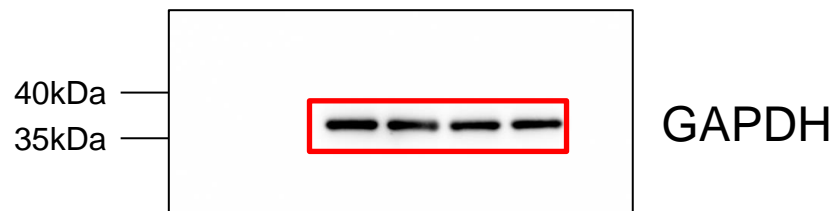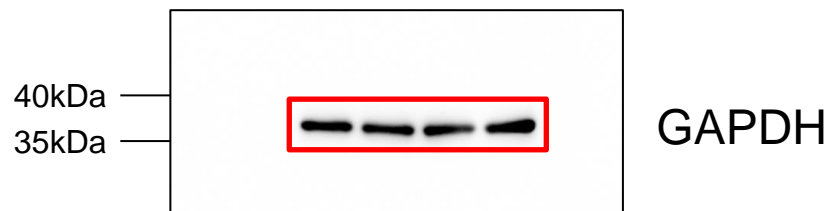



Figure 5c

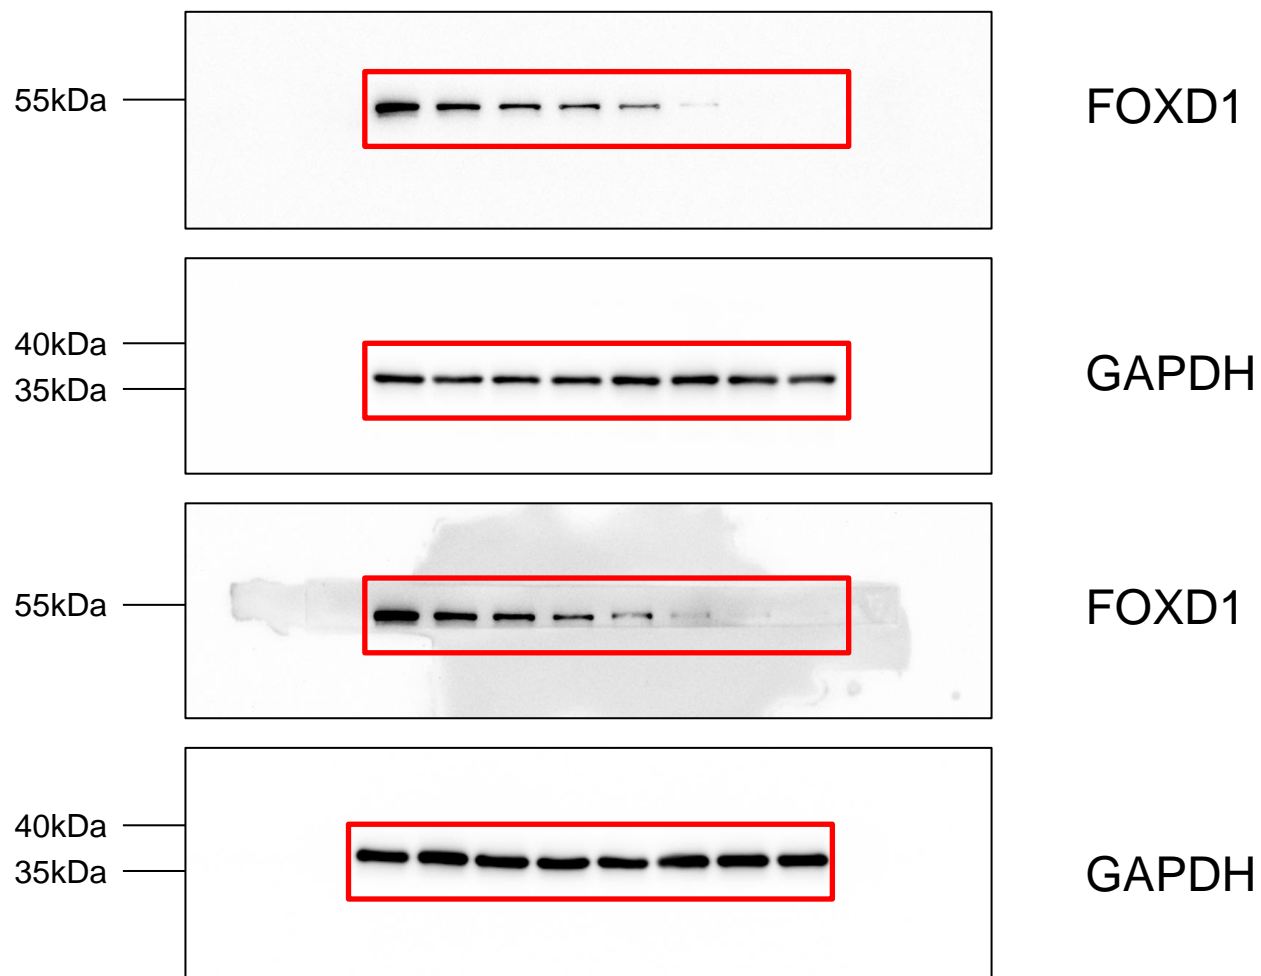

Figure 5d

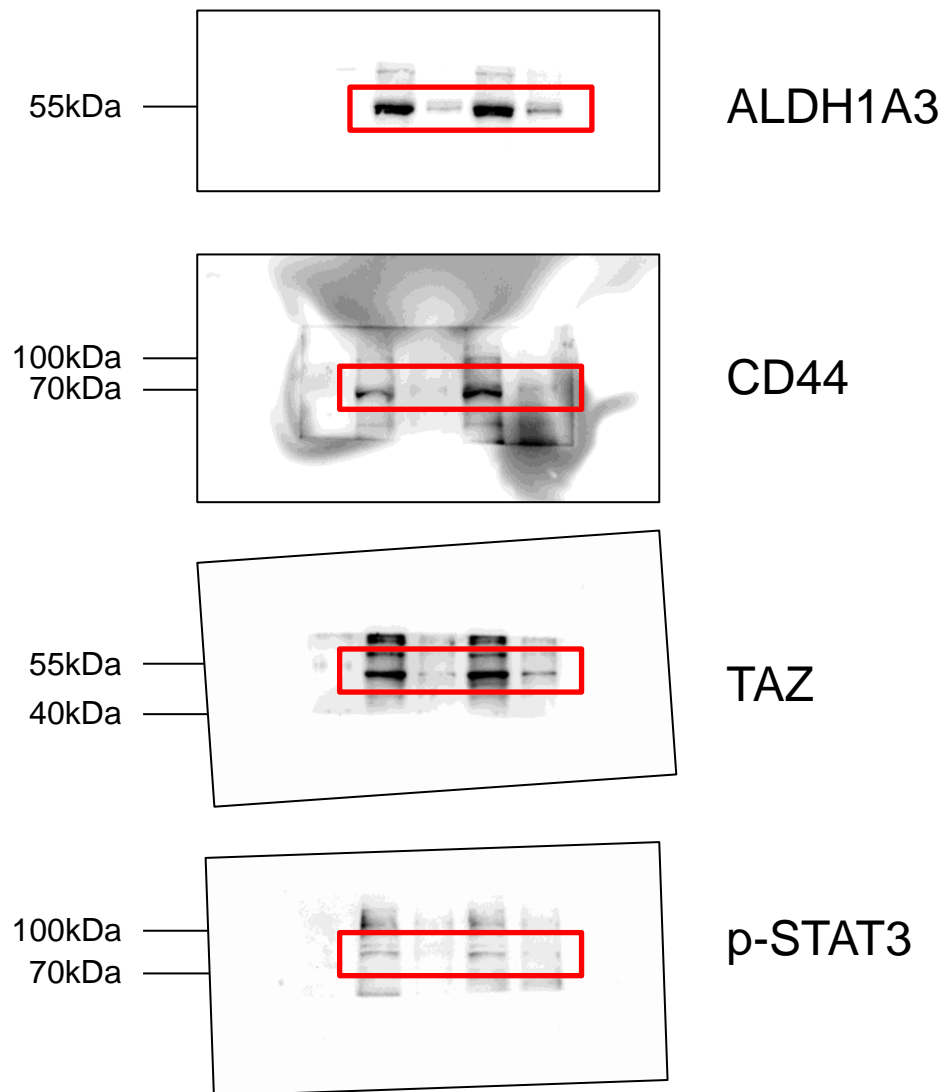

Figure 5d

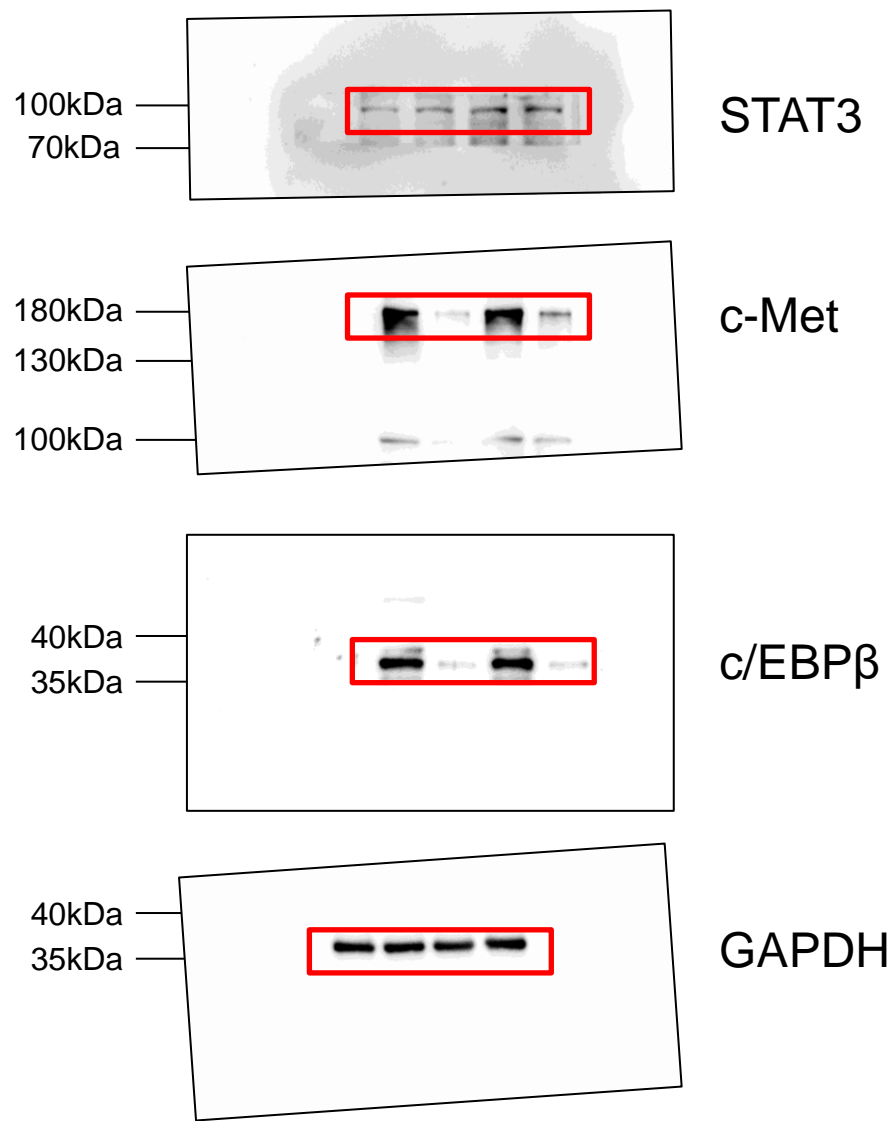

# Supplemental Figure 1a

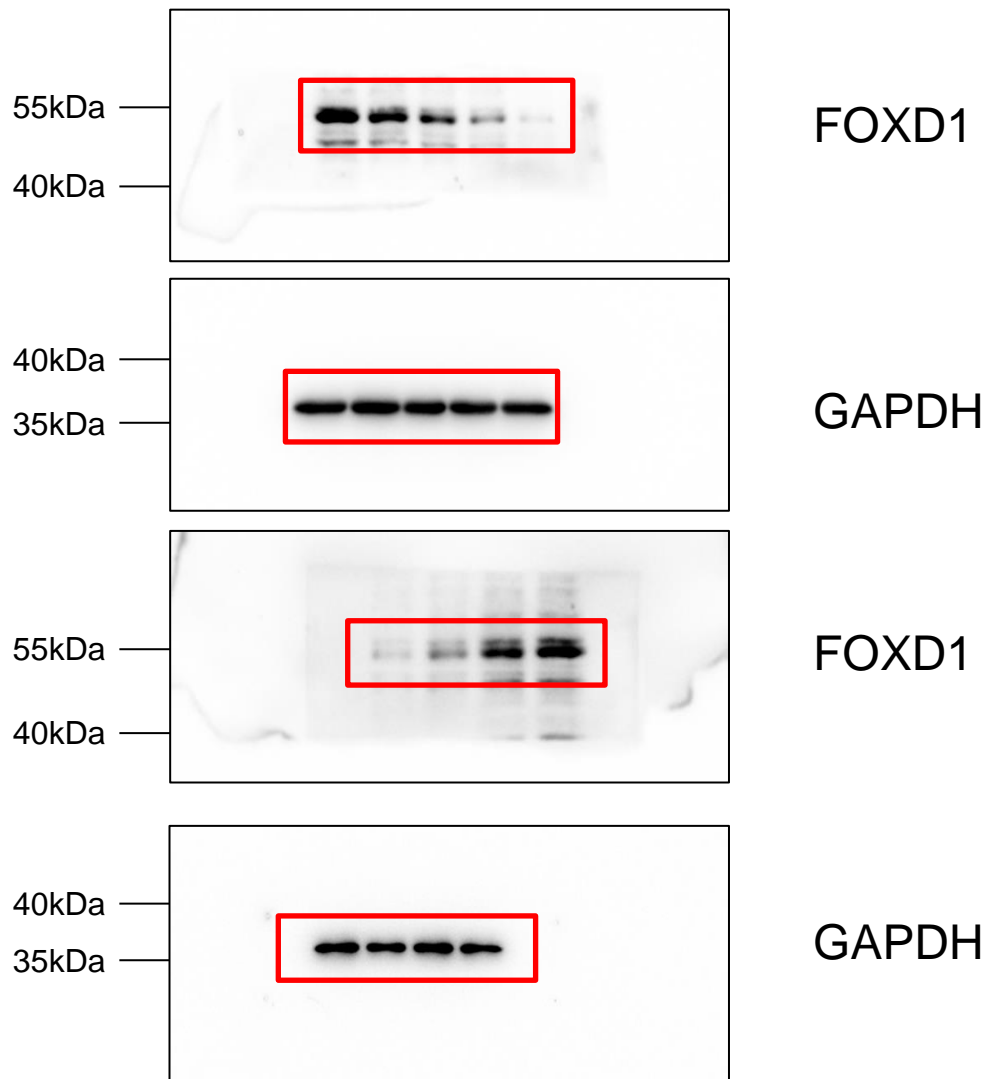

# Supplemental Figure 1a

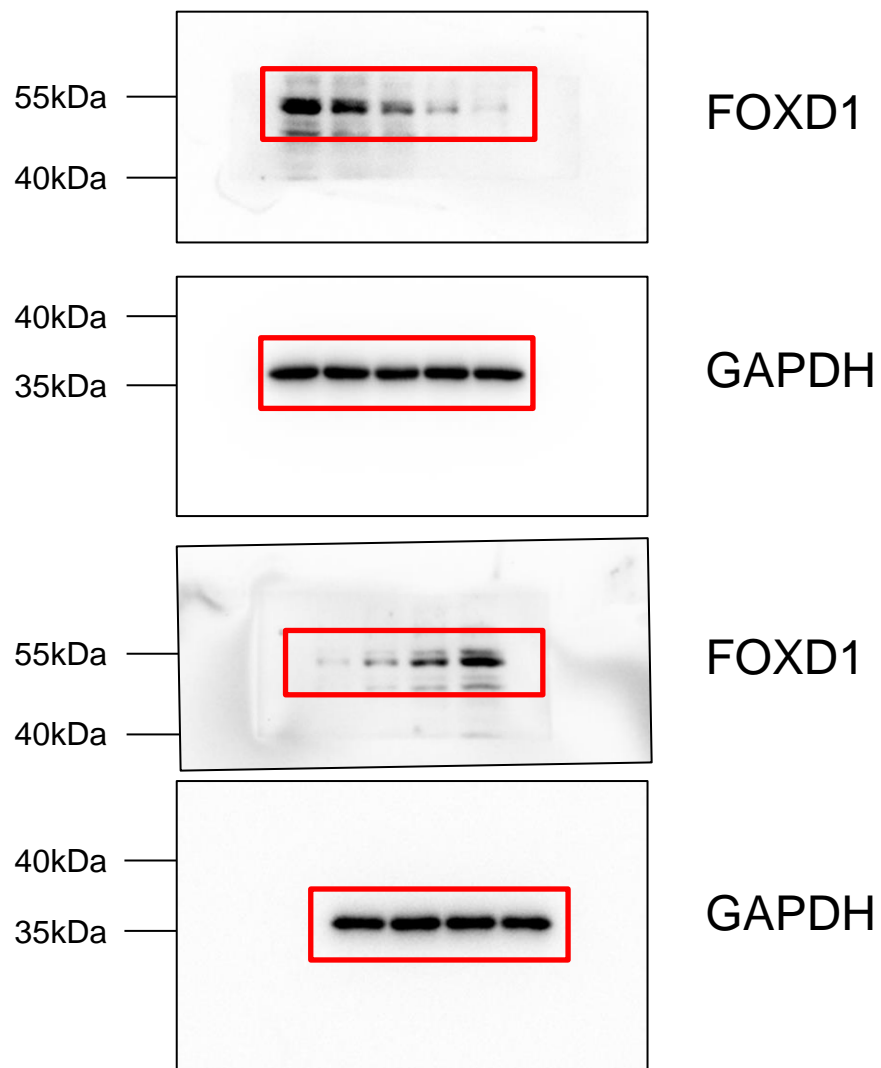

# Supplemental Figure 1b

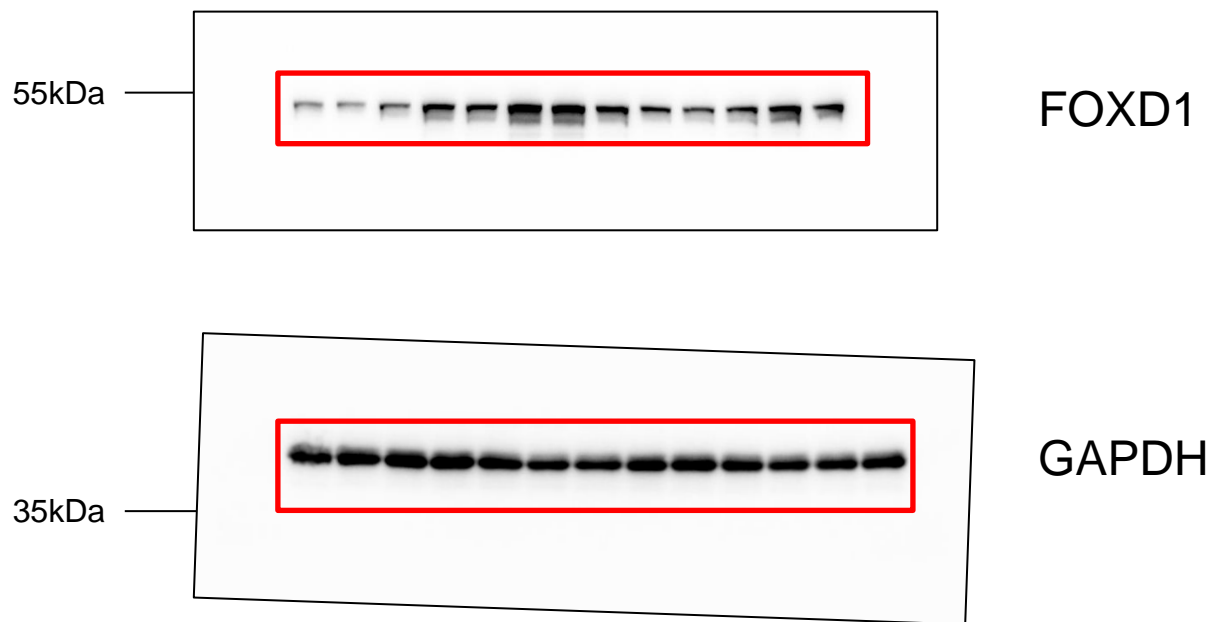

# Supplemental Figure 1b

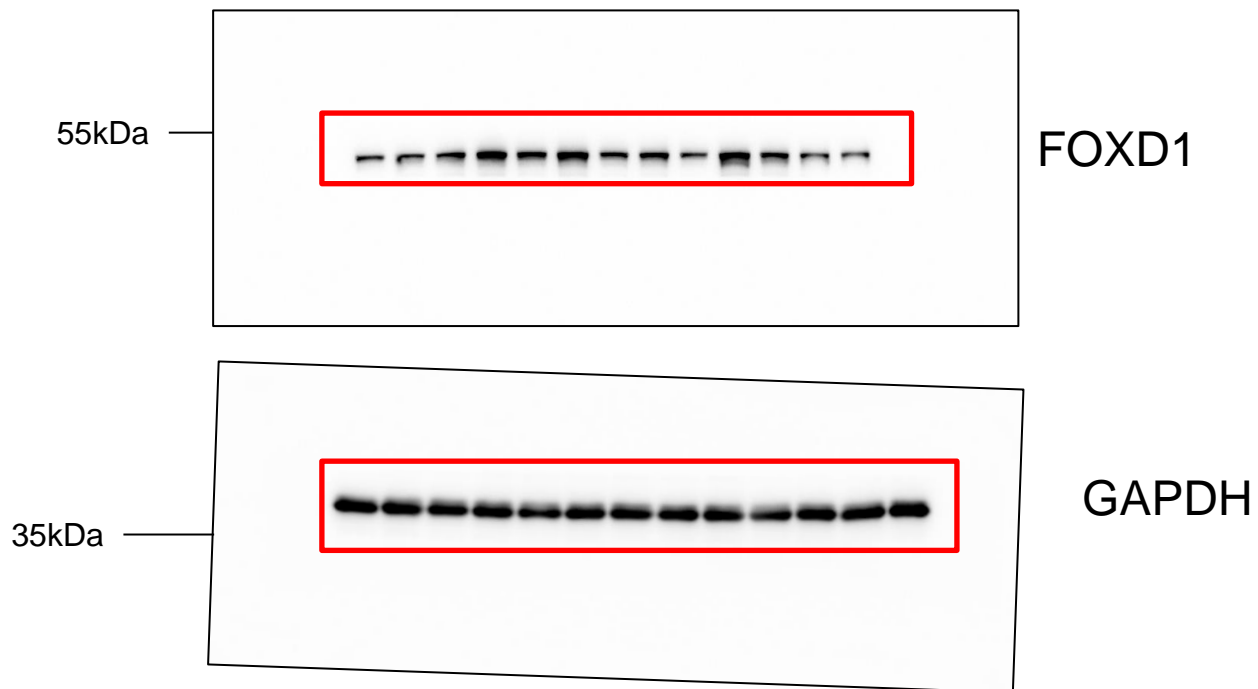

# Supplemental Figure 1b

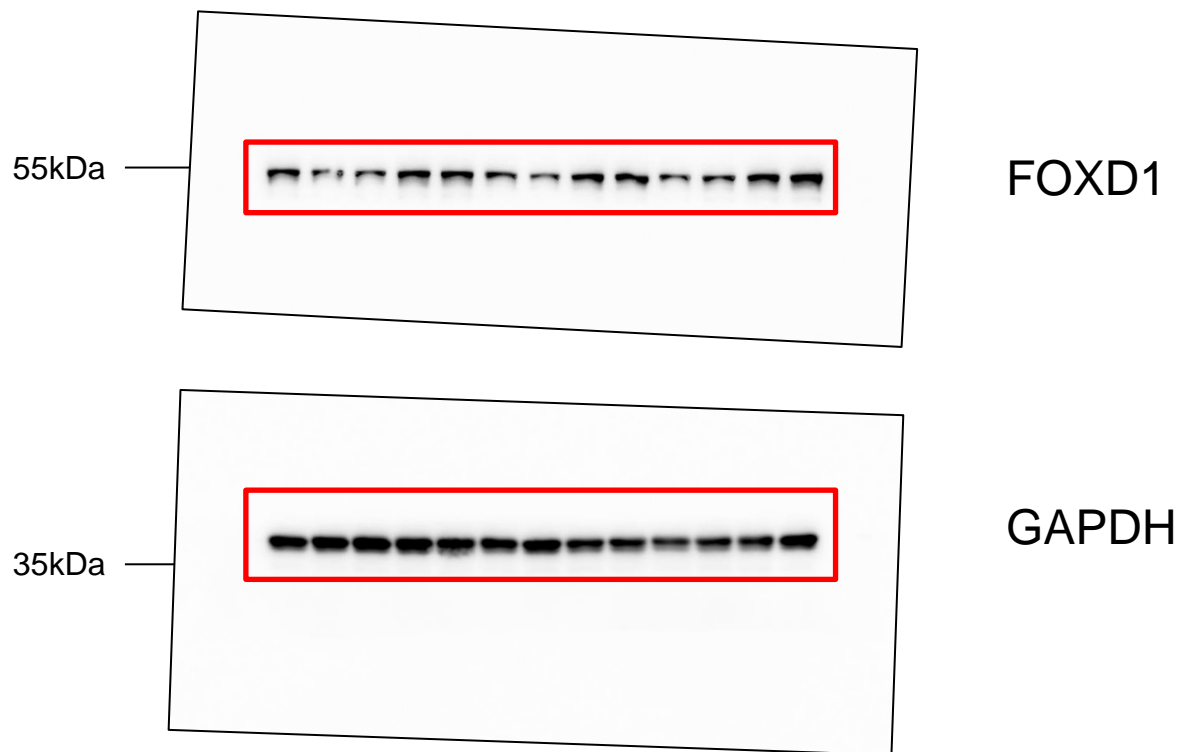



# Supplemental Figure 1b

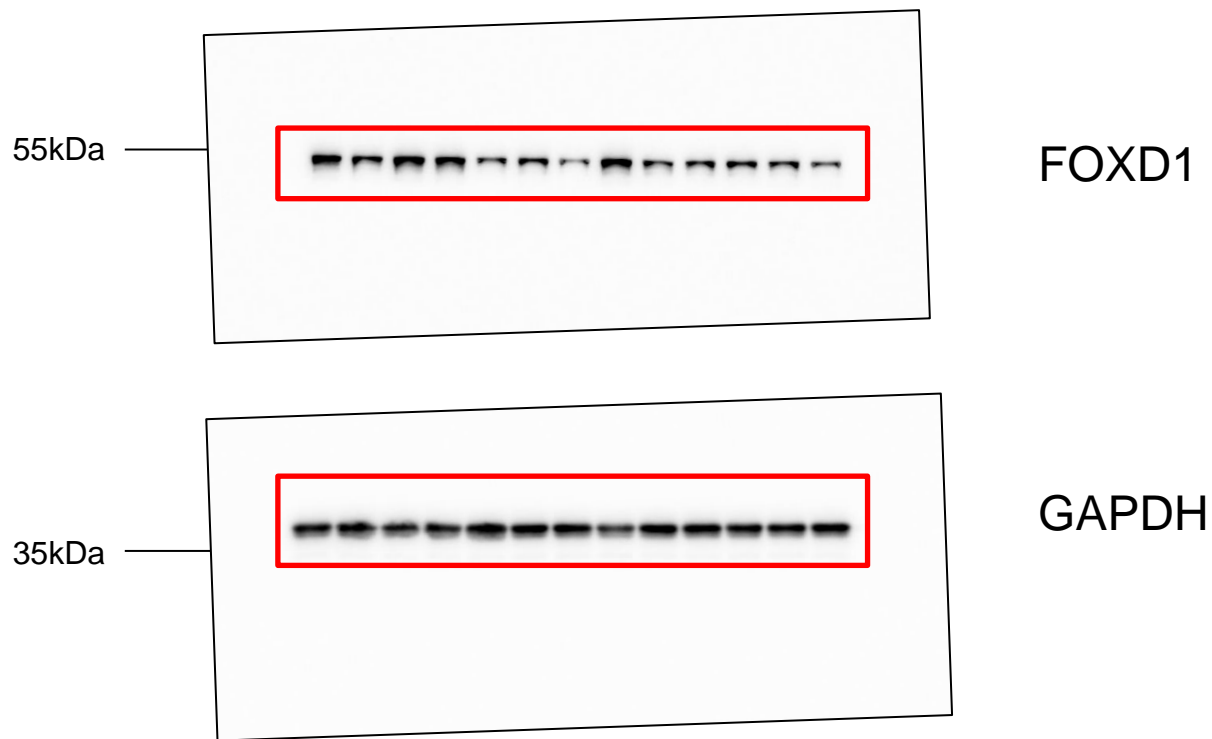

# Supplemental Figure 1b

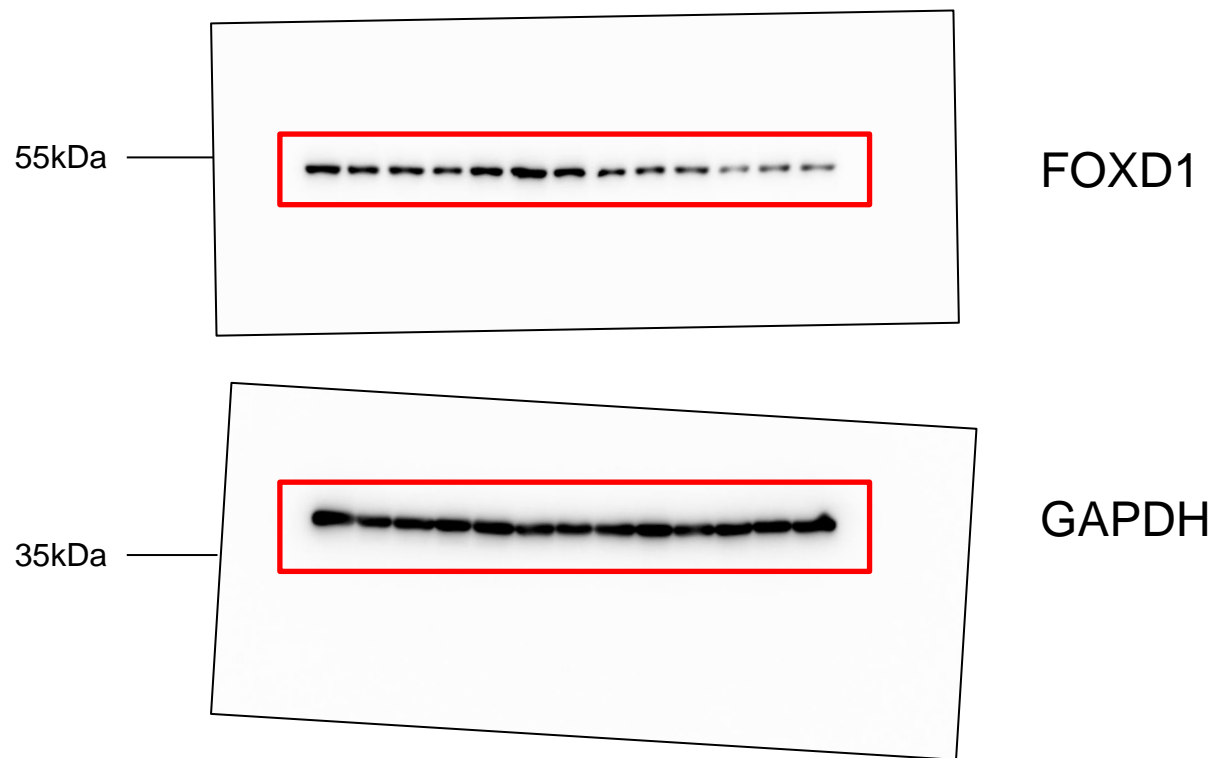

# Supplemental Figure 1b

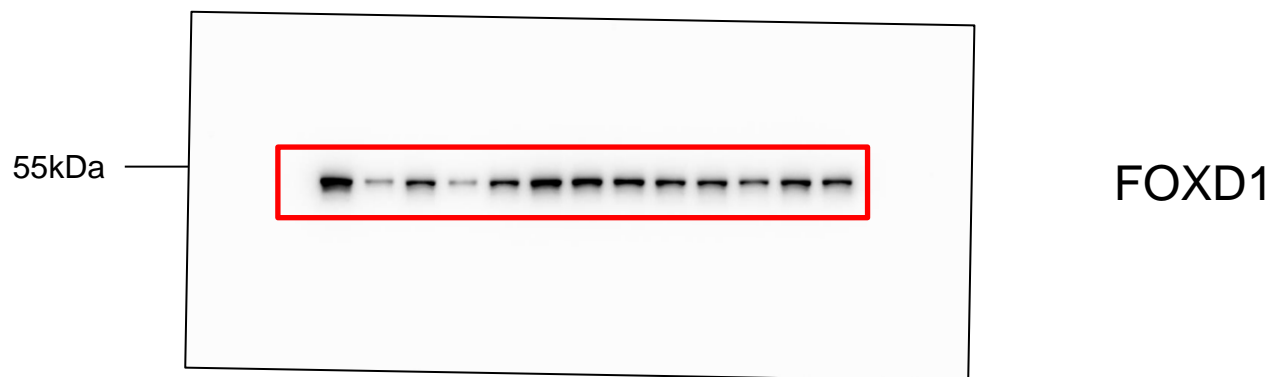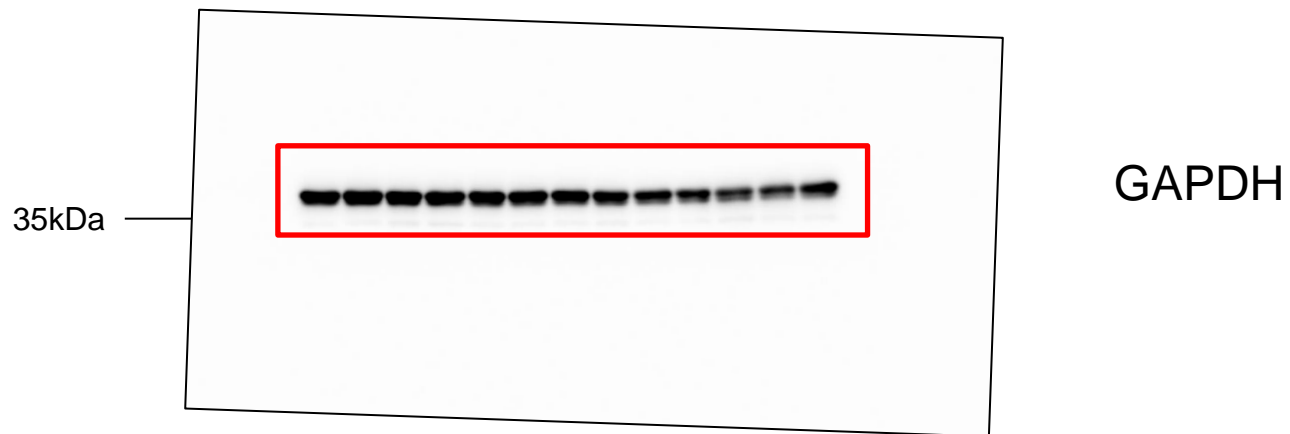

# Supplemental Figure 1b

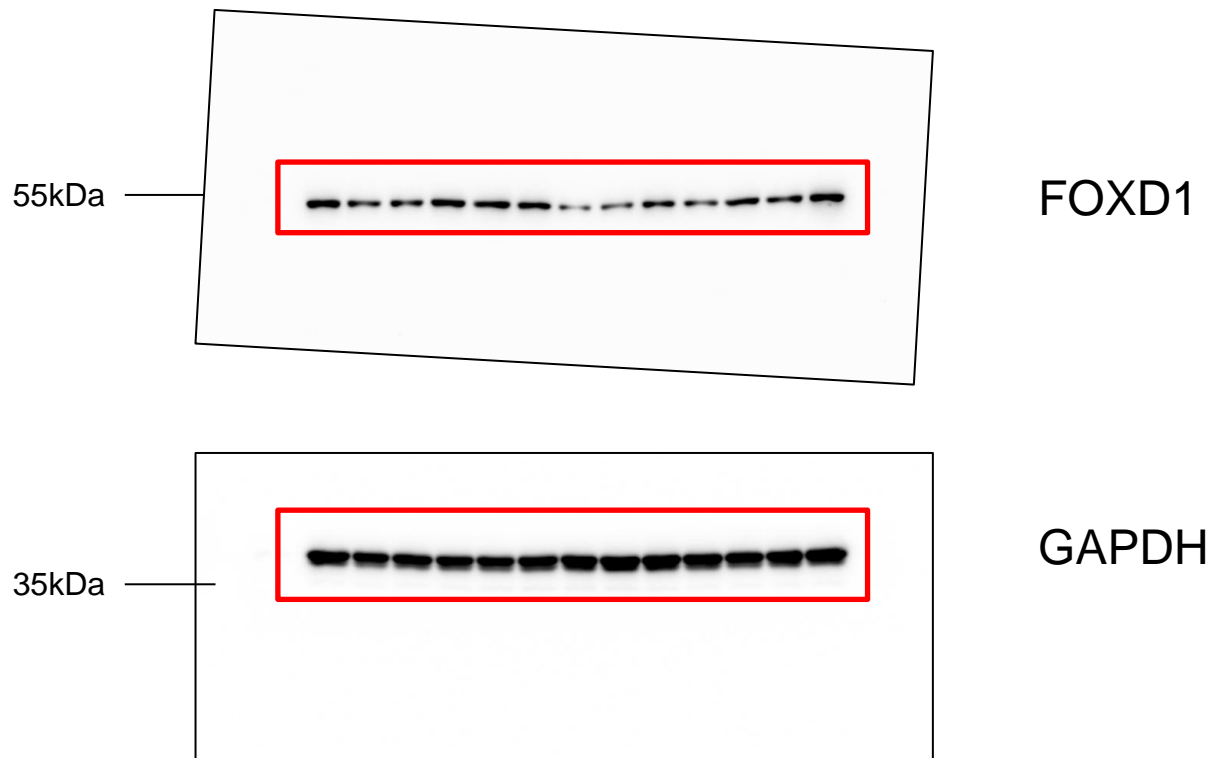

# Supplemental Figure 1b

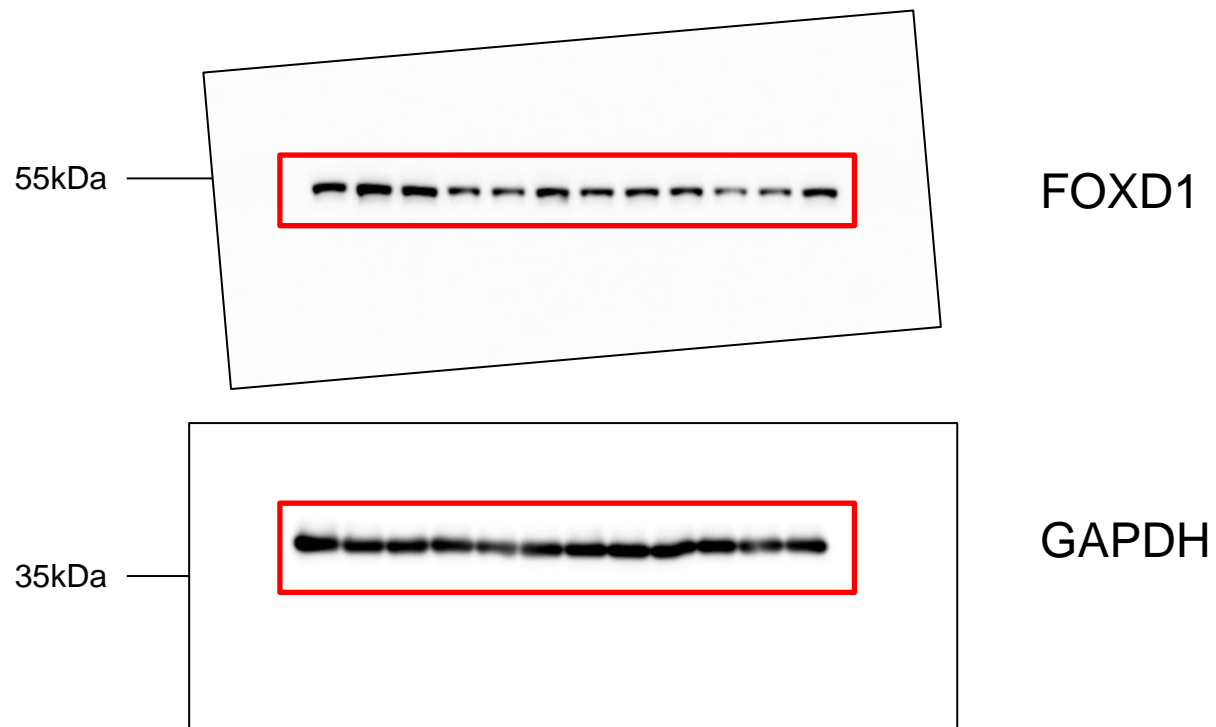

# Supplemental Figure 1b

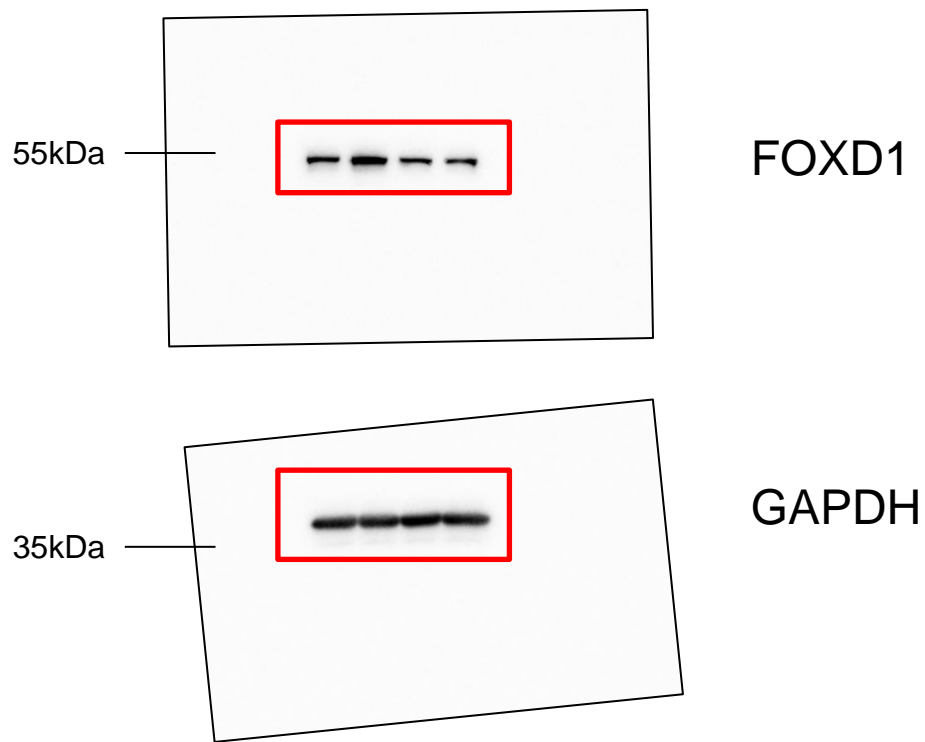

# Supplemental Figure 1e

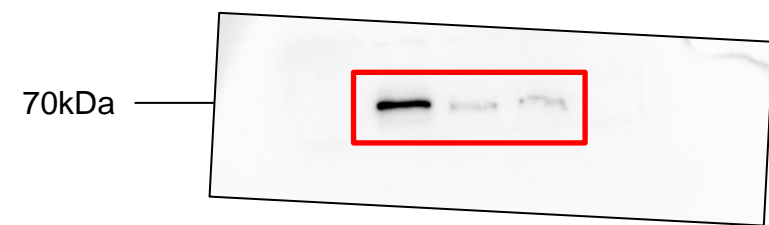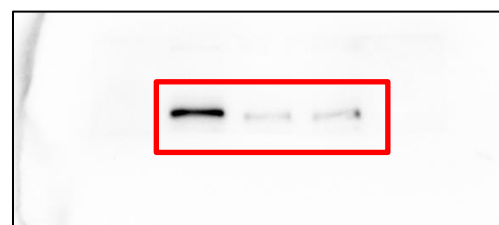

USP21

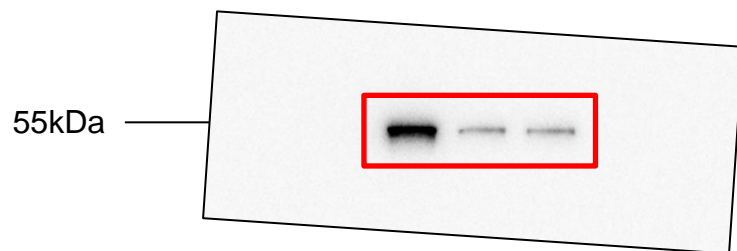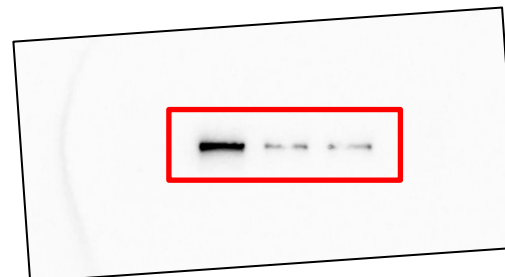

FOXD1

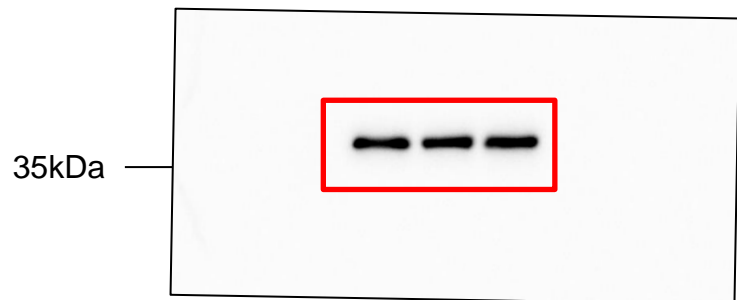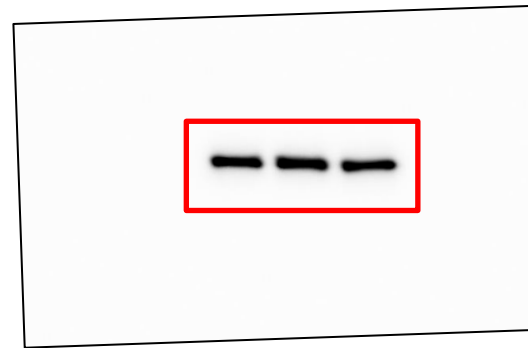

GAPDH

# Supplemental Figure 1f

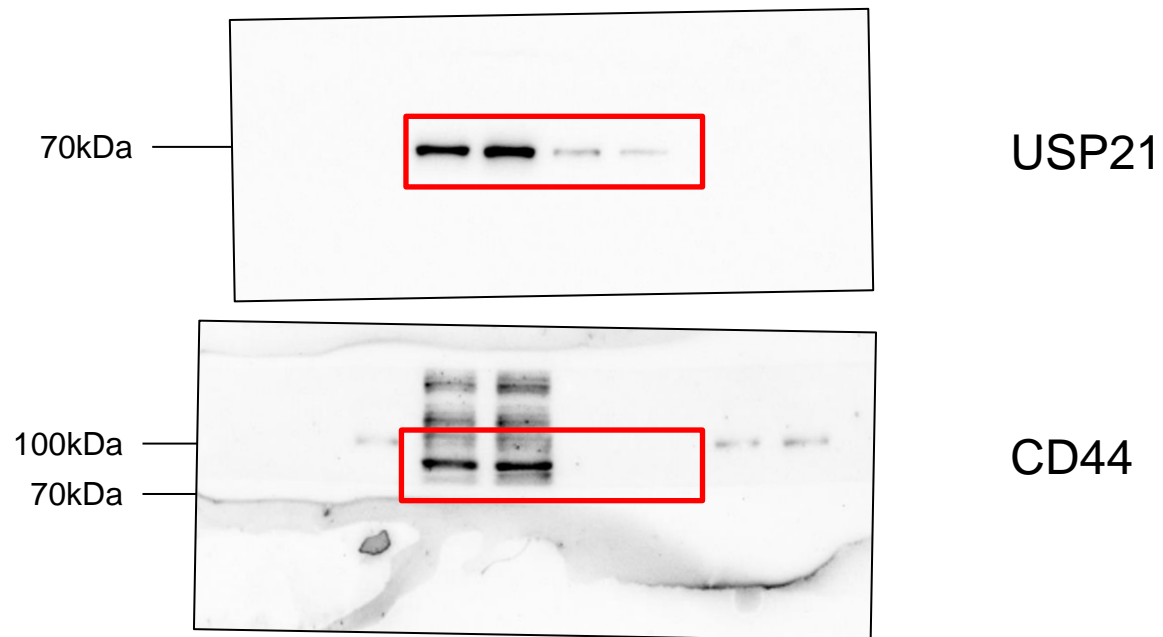



# Supplemental Figure 1f

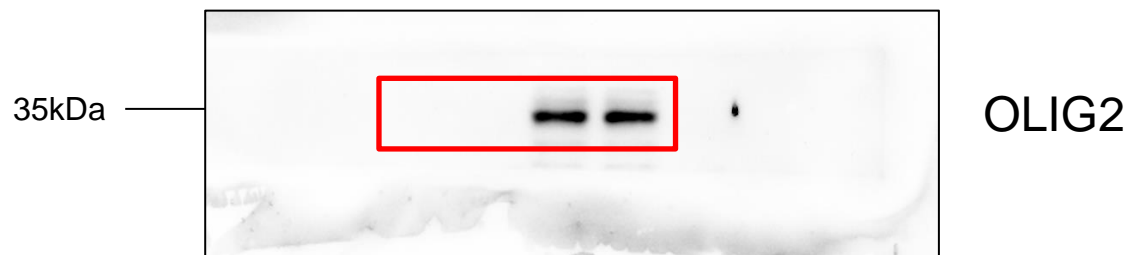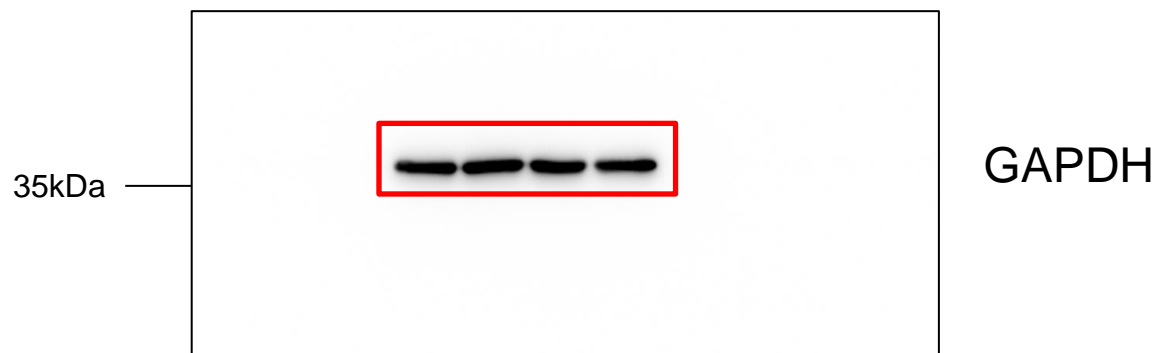

## Supplemental Figure 2a

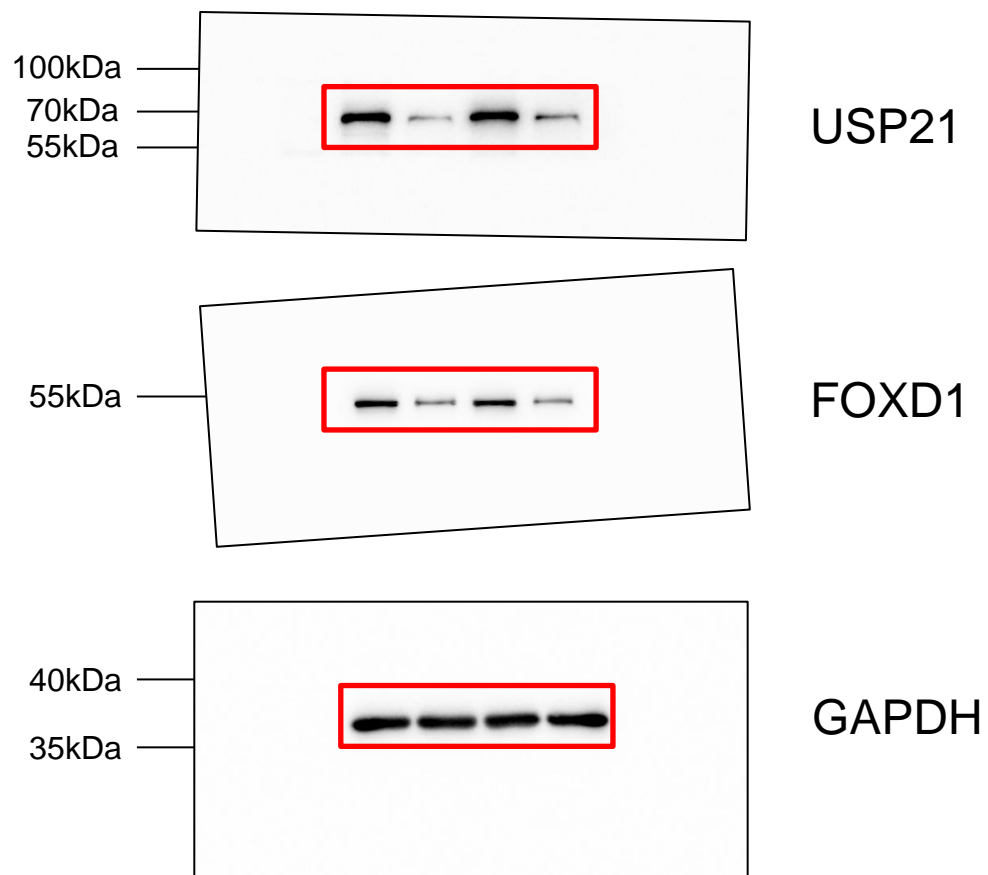

Supplement: 41419_2022_5163_MOESM7_ESM.pdf [file 41419_2022_5163_MOESM7_ESM.pdf]
